# Supplementary material
Source: PubMed Central journal article supplement (PMC5505805)
Supplement: NIHMS867267-supplement-11064_2017_2260_MOESM1_ESM.pdf [file NIHMS867267-supplement-11064_2017_2260_MOESM1_ESM.pdf]

Contents, Supplementary File 1

Identification of the differentially expressed proteins in the mouse hippocampus following *status epilepticus*

|                          |                                  |
|--------------------------|----------------------------------|
| <b>Figure 1</b> , page 1 | Summary of proteomic data        |
| <b>Table 1</b> , page 2  | Injury - Upregulated at 3h       |
| <b>Table 2</b> , page 3  | Injury - Downregulated at 3h     |
| <b>Table 3</b> , page 4  | Tolerance - Upregulated at 3h    |
| <b>Table 4</b> , page 6  | Tolerance - Downregulated at 3h  |
| <b>Table 5</b> , page 7  | Injury - Upregulated at 24h      |
| <b>Table 6</b> , page 9  | Injury - Downregulated at 24h    |
| <b>Table 7</b> , page 10 | Tolerance - Upregulated at 24h   |
| <b>Table 8</b> , page 11 | Tolerance - Downregulated at 24h |

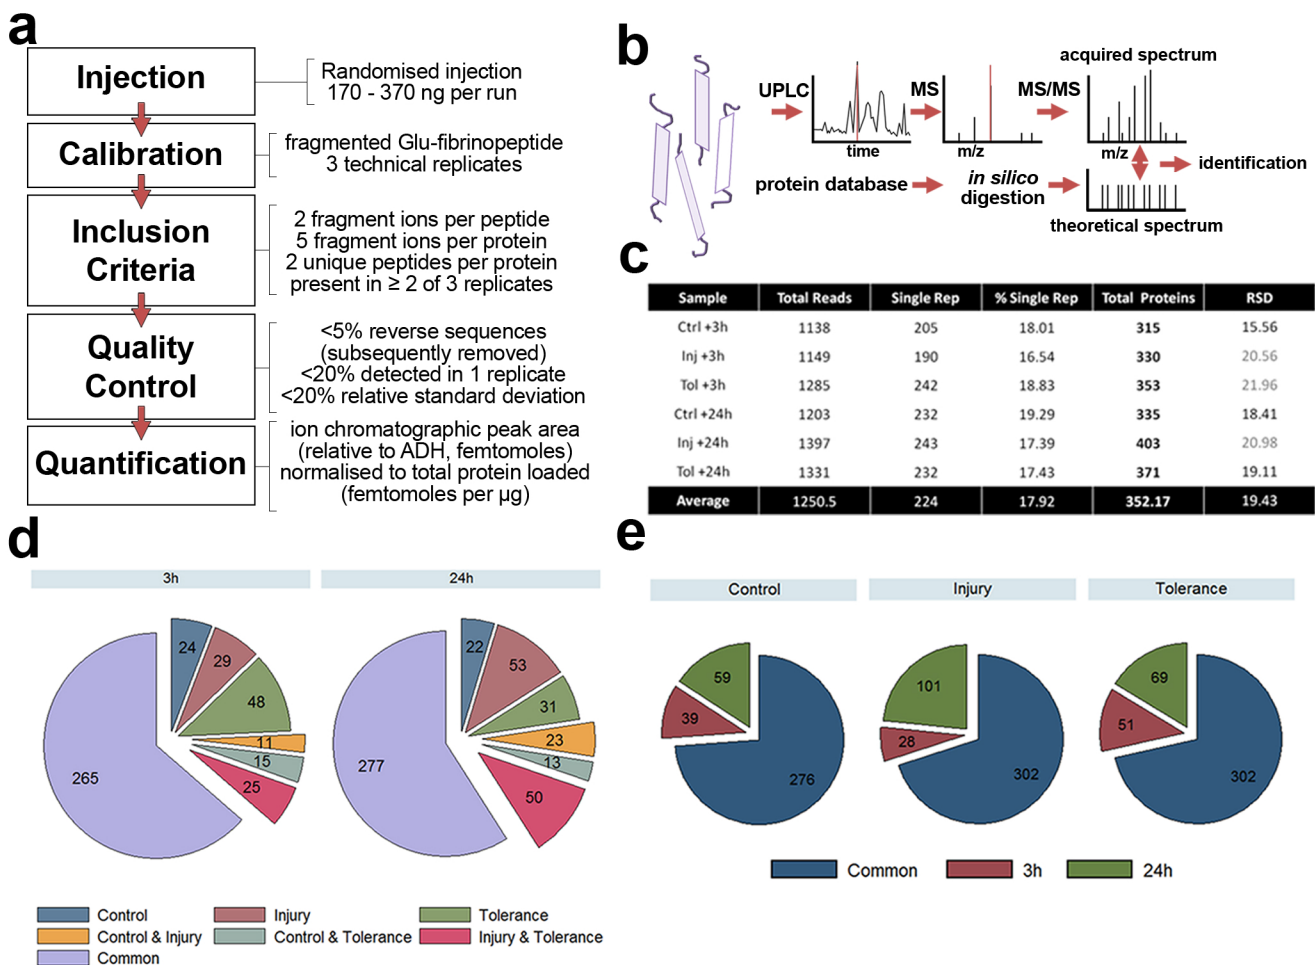

**Fig. 1 Summary of proteomic profiling** (a) Loading, calibration and inclusion criteria for accepted peptide fragments and proteins were defined prior to qMS analysis. Following qMS analysis, quality control criteria were applied to validate measurements and quantification of identified proteins was carried out as described in the text. (b) Depiction of the assay workflow during liquid chromatography, acquisition of protein spectra and identification of putative proteins. (c) Protein counts were merged across all replicates and read reliability was estimated. (d, e) Total counts of unique and commonly identified proteins after stratifying by treatment and timepoint were tabulated, using a ratio cutoff of  $\pm 30\%$ . ADH, alcohol dehydrogenase; MS, mass spectrometry; RSD, relative standard deviation; UPLC, ultra performance liquid chromatography.

**Table 1**

Identification of the differentially expressed proteins in the mouse hippocampus of the injury group by qMS - **Upregulated at 3h**

| UniGene ID | UniProt ID | Name, Description                                                                                    |
|------------|------------|------------------------------------------------------------------------------------------------------|
| Mm.686     | P68033     | ACTC MOUSE Actin alpha cardiac muscle 1 OS Mus musculus GN Actc1 PE 1 SV 1                           |
| Mm.253090  | P17427     | AP2A2 MOUSE AP 2 complex subunit alpha 2 OS Mus musculus GN Ap2a2 PE 1 SV 2                          |
| Mm.26743   | Q00623     | APOA1 MOUSE Apolipoprotein A I OS Mus musculus GN Apoa1 PE 1 SV 1                                    |
| Mm.389075  | P84084     | ARF5 MOUSE ADP ribosylation factor 5 OS Mus musculus GN Arf5 PE 2 SV 2                               |
| Mm.271178  | Q9CQW2     | ARL8B MOUSE ADP ribosylation factor like protein 8B OS Mus musculus GN Arl8b PE 2 SV 1               |
| Mm.31395   | Q00493     | CBPE MOUSE Carboxypeptidase E OS Mus musculus GN Cpe PE 1 SV 2                                       |
| Mm.298875  | O08585     | CLCA MOUSE Clathrin light chain A OS Mus musculus GN Clta PE 1 SV 1                                  |
| Mm.290026  | Q6IRU5     | CLCB MOUSE Clathrin light chain B OS Mus musculus GN Cltb PE 2 SV 1                                  |
| Mm.393405  | Q9CQI6     | COTL1 MOUSE Coactosin like protein OS Mus musculus GN Cotl1 PE 1 SV 3                                |
| Mm.378921  | P23242     | CXA1 MOUSE Gap junction alpha 1 protein OS Mus musculus GN Gja1 PE 1 SV 2                            |
| Mm.28919   | Q9R0P5     | DEST MOUSE Destrin OS Mus musculus GN Dstn PE 1 SV 3                                                 |
| Mm.27256   | Q62108     | DLG4 MOUSE Disks large homolog 4 OS Mus musculus GN Dlg4 PE 1 SV 1                                   |
| Mm.271703  | Q9DC51     | GNAI3 MOUSE Guanine nucleotide binding protein G k subunit alpha OS Mus musculus GN Gnai3 PE 1 SV 3  |
| Mm.441542  | P46425     | GSTP2 MOUSE Glutathione S transferase P 2 OS Mus musculus GN Gstp2 PE 2 SV 2                         |
| Mm.193539  | P15864     | H12 MOUSE Histone H1 2 OS Mus musculus GN Hist1h1c PE 1 SV 2                                         |
| Mm.435460  | Q64522     | H2A2B MOUSE Histone H2A type 2 B OS Mus musculus GN Hist2h2ab PE 1 SV 3                              |
| Mm.490945  | Q64525     | H2B2B MOUSE Histone H2B type 2 B OS Mus musculus GN Hist2h2bb PE 1 SV 3                              |
| Mm.270681  | Q61699     | HS105 MOUSE Heat shock protein 105 kDa OS Mus musculus GN Hsp11 PE 1 SV 2                            |
| Mm.6388    | Q61696     | HS71A MOUSE Heat shock 70 kDa protein 1A OS Mus musculus GN Hspa1a PE 1 SV 2                         |
| Mm.260084  | P10630     | IF4A2 MOUSE Eukaryotic initiation factor 4A II OS Mus musculus GN Eif4a2 PE 2 SV 2                   |
| Mm.255822  | Q6PHZ2     | KCC2D MOUSE Calcium calmodulin dependent protein kinase type II subunit delta OS Mus musculus GN Cam |
| Mm.383180  | P53657     | KPYR MOUSE Pyruvate kinase isozymes R L OS Mus musculus GN Pk1r PE 2 SV 1                            |
| Mm.296082  | Q9CR62     | M2OM MOUSE Mitochondrial 2 oxoglutarate malate carrier protein OS Mus musculus GN Slc25a11 PE 1 SV 3 |
| Mm.154087  | Q7TSJ2     | MAP6 MOUSE Microtubule associated protein 6 OS Mus musculus GN Map6 PE 1 SV 2                        |
| Mm.2326    | P34884     | MIF MOUSE Macrophage migration inhibitory factor OS Mus musculus GN Mif PE 1 SV 2                    |
| Mm.210857  | Q61885     | MOG MOUSE Myelin oligodendrocyte glycoprotein OS Mus musculus GN Mog PE 1 SV 1                       |
| Mm.393563  | Q7M6Y3     | PICA MOUSE Phosphatidylinositol binding clathrin assembly protein OS Mus musculus GN Picalm PE 1 SV  |
| Mm.274432  | P48453     | PP2BB MOUSE Serine threonine protein phosphatase 2B catalytic subunit beta isoform OS Mus musculus G |
| Mm.266033  | Q504M8     | RAB26 MOUSE Ras related protein Rab 26 OS Mus musculus GN Rab26 PE 2 SV 1                            |
| Mm.482114  | Q91ZR1     | RAB4B MOUSE Ras related protein Rab 4B OS Mus musculus GN Rab4b PE 2 SV 2                            |
| Mm.334313  | Q61411     | RASH MOUSE GTPase HRas OS Mus musculus GN Hras1 PE 1 SV 2                                            |
| Mm.297372  | P62984     | RL40 MOUSE Ubiquitin 60S ribosomal protein L40 OS Mus musculus GN Uba52 PE 1 SV 2                    |
| Mm.5260    | P31648     | SC6A1 MOUSE Sodium and chloride dependent GABA transporter 1 OS Mus musculus GN Slc6a1 PE 1 SV 2     |
| Mm.270259  | O55131     | SEPT7 MOUSE Septin 7 OS Mus musculus GN Sept7 PE 1 SV 1                                              |
| Mm.134191  | Q99JR1     | SFXN1 MOUSE Sideroflexin 1 OS Mus musculus GN Sfxn1 PE 1 SV 3                                        |
| Mm.358663  | Q9RON5     | SYT5 MOUSE Synaptotagmin 5 OS Mus musculus GN Syt5 PE 1 SV 1                                         |
| Mm.88212   | P68373     | TBA1C MOUSE Tubulin alpha 1C chain OS Mus musculus GN Tuba1c PE 1 SV 1                               |
| Mm.123366  | Q9CQN1     | TRAP1 MOUSE Heat shock protein 75 kDa mitochondrial OS Mus musculus GN Trap1 PE 1 SV 1               |
| Mm.37214   | Q92111     | TRFE MOUSE Serotransferrin OS Mus musculus GN Tf PE 1 SV 1                                           |

**Table 2**

Identification of the differentially expressed proteins in the mouse hippocampus of the injury group by qMS - **Downregulated at 3h**

| UniGene ID | UniProt ID | Name, Description                                                                                    |
|------------|------------|------------------------------------------------------------------------------------------------------|
| Mm.12821   | Q64436     | ATP4A MOUSE Potassium transporting ATPase alpha chain 1 OS Mus musculus GN Atp4a PE 1 SV 3           |
| Mm.136093  | Q06185     | ATP5I MOUSE ATP synthase subunit e mitochondrial OS Mus musculus GN Atp5i PE 1 SV 2                  |
| Mm.806     | P35762     | CD81 MOUSE CD81 antigen OS Mus musculus GN Cd81 PE 1 SV 1                                            |
| Mm.454389  | Q5SQX6     | CYFP2 MOUSE Cytoplasmic FMR1 interacting protein 2 OS Mus musculus GN Cyfp2 PE 1 SV 2                |
| Mm.246436  | Q9D0M5     | DYL2 MOUSE Dynein light chain 2 cytoplasmic OS Mus musculus GN Dynll2 PE 1 SV 1                      |
| Mm.433257  | P39054     | DYN2 MOUSE Dynamin 2 OS Mus musculus GN Dnm2 PE 1 SV 2                                               |
| Mm.41502   | P97807     | FUMH MOUSE Fumarate hydratase mitochondrial OS Mus musculus GN Fh PE 1 SV 3                          |
| Mm.45054   | Q9R111     | GUAD MOUSE Guanine deaminase OS Mus musculus GN Gda PE 1 SV 1                                        |
| Mm.270641  | Q8BGZ1     | HPCL4 MOUSE Hippocalcin like protein 4 OS Mus musculus GN Hpcal4 PE 2 SV 3                           |
| Mm.39739   | Q8K0U4     | HS12A MOUSE Heat shock 70 kDa protein 12A OS Mus musculus GN Hspa12a PE 1 SV 1                       |
| Mm.14825   | P70404     | IDHG1 MOUSE Isocitrate dehydrogenase NAD subunit gamma 1 mitochondrial OS Mus musculus GN Idh3g P    |
| Mm.269649  | P12382     | K6PL MOUSE 6 phosphofructokinase liver type OS Mus musculus GN Pfkf PE 1 SV 4                        |
| Mm.235182  | Q923T9     | KCC2G MOUSE Calcium calmodulin dependent protein kinase type II subunit gamma OS Mus musculus GN Cam |
| Mm.241355  | P20917     | MAG MOUSE Myelin associated glycoprotein OS Mus musculus GN Mag PE 1 SV 2                            |
| Mm.1956    | P08551     | NFL MOUSE Neurofilament light polypeptide OS Mus musculus GN Nefl PE 1 SV 5                          |
| Mm.293716  | O55125     | NIPS1 MOUSE Protein NipSnap homolog 1 OS Mus musculus GN Nipsnap1 PE 1 SV 1                          |
| Mm.200859  | Q61206     | PA1B2 MOUSE Platelet activating factor acetylhydrolase IB subunit beta OS Mus musculus GN Pafah1b2 P |
| Mm.221275  | Q8K0T0     | RTN1 MOUSE Reticulon 1 OS Mus musculus GN Rtn1 PE 1 SV 1                                             |
| Mm.378957  | P54227     | STMN1 MOUSE Stathmin OS Mus musculus GN Stmn1 PE 1 SV 2                                              |
| Mm.3074    | P68037     | UB2L3 MOUSE Ubiquitin conjugating enzyme E2 L3 OS Mus musculus GN Ube2l3 PE 2 SV 1                   |
| Mm.227704  | Q60931     | VDAC3 MOUSE Voltage dependent anion selective channel protein 3 OS Mus musculus GN Vdac3 PE 1 SV 1   |
| Mm.475829  | Q9Z1G4     | VPP1 MOUSE V type proton ATPase 116 kDa subunit a isoform 1 OS Mus musculus GN Atp6v0a1 PE 1 SV 3    |

**Table 3**

Identification of the differentially expressed proteins in the mouse hippocampus of the tolerance group by qMS - **Upregulated at 3h**

| UniGene ID | UniProt ID | Name, Description                                                                                    |
|------------|------------|------------------------------------------------------------------------------------------------------|
| Mm.233813  | P61982     | 1433G MOUSE 14 3 3 protein gamma OS Mus musculus GN Ywhag PE 1 SV 2                                  |
| Mm.221038  | Q3UJH0     | AAK1 MOUSE AP2 associated protein kinase 1 OS Mus musculus GN Aak1 PE 1 SV 2                         |
| Mm.276251  | P46660     | AINX MOUSE Alpha internexin OS Mus musculus GN Ina PE 1 SV 2                                         |
| Mm.284446  | P47738     | ALDH2 MOUSE Aldehyde dehydrogenase mitochondrial OS Mus musculus GN Aldh2 PE 1 SV 1                  |
| Mm.30010   | Q9WV32     | ARC1B MOUSE Actin related protein 2 3 complex subunit 1B OS Mus musculus GN Arpc1b PE 1 SV 4         |
| Mm.371546  | P84078     | ARF1 MOUSE ADP ribosylation factor 1 OS Mus musculus GN Arf1 PE 1 SV 2                               |
| Mm.259045  | P61161     | ARP2 MOUSE Actin related protein 2 OS Mus musculus GN Actr2 PE 1 SV 1                                |
| Mm.273271  | Q9Z1W8     | AT12A MOUSE Potassium transporting ATPase alpha chain 2 OS Mus musculus GN Atp12a PE 1 SV 3          |
| Mm.12821   | Q64436     | ATP4A MOUSE Potassium transporting ATPase alpha chain 1 OS Mus musculus GN Atp4a PE 1 SV 3           |
| Mm.330524  | Q99N28     | CADM3 MOUSE Cell adhesion molecule 3 OS Mus musculus GN Cadm3 PE 1 SV 1                              |
| Mm.178322  | Q8R464     | CADM4 MOUSE Cell adhesion molecule 4 OS Mus musculus GN Cadm4 PE 1 SV 1                              |
| Mm.285993  | P62204     | CALM MOUSE Calmodulin OS Mus musculus GN Calm1 PE 1 SV 2                                             |
| Mm.1971    | P14211     | CALR MOUSE Calreticulin OS Mus musculus GN Calr PE 1 SV 1                                            |
| Mm.248827  | P35564     | CALX MOUSE Calnexin OS Mus musculus GN Canx PE 1 SV 1                                                |
| Mm.26940   | P48758     | CBR1 MOUSE Carbonyl reductase NADPH 1 OS Mus musculus GN Cbr1 PE 1 SV 3                              |
| Mm.489675  | Q91V57     | CHIN MOUSE N chimaerin OS Mus musculus GN Chn1 PE 1 SV 2                                             |
| Mm.44220   | Q9QXT0     | CNPY2 MOUSE Protein canopy homolog 2 OS Mus musculus GN Cnpy2 PE 2 SV 1                              |
| Mm.276826  | P45591     | COF2 MOUSE Cofilin 2 OS Mus musculus GN Cfl2 PE 1 SV 1                                               |
| Mm.154358  | Q55QX6     | CYFP2 MOUSE Cytoplasmic FMR1 interacting protein 2 OS Mus musculus GN Cyfp2 PE 1 SV 2                |
| Mm.158231  | Q8K2B3     | DHSA MOUSE Succinate dehydrogenase ubiquinone flavoprotein subunit mitochondrial OS Mus musculus     |
| Mm.218820  | Q8K1M6     | DNM1L MOUSE Dynamin 1 like protein OS Mus musculus GN Dnm1l PE 1 SV 2                                |
| Mm.131135  | Q9WV92     | E41L3 MOUSE Band 4 1 like protein 3 OS Mus musculus GN Epb41l3 PE 1 SV 1                             |
| Mm.200497  | Q8BMS1     | ECHA MOUSE Trifunctional enzyme subunit alpha mitochondrial OS Mus musculus GN Hadha PE 1 SV 1       |
| Mm.247762  | Q9D8N0     | EF1G MOUSE Elongation factor 1 gamma OS Mus musculus GN Eef1g PE 1 SV 3                              |
| Mm.326799  | P58252     | EF2 MOUSE Elongation factor 2 OS Mus musculus GN Eef2 PE 1 SV 2                                      |
| Mm.395598  | Q9D8Y0     | EFHD2 MOUSE EF hand domain containing protein D2 OS Mus musculus GN Efhd2 PE 1 SV 1                  |
| Mm.251322  | P21550     | ENOB MOUSE Beta enolase OS Mus musculus GN Eno3 PE 1 SV 3                                            |
| Mm.68134   | Q8VDI1     | ESIP1 MOUSE Epithelial stromal interaction protein 1 OS Mus musculus GN Epsti1 PE 1 SV 2             |
| Mm.370185  | P27600     | GNA12 MOUSE Guanine nucleotide binding protein subunit alpha 12 OS Mus musculus GN Gna12 PE 1 SV 3   |
| Mm.3711    | Q64521     | GPDM MOUSE Glycerol 3 phosphate dehydrogenase mitochondrial OS Mus musculus GN Gpd2 PE 1 SV 2        |
| Mm.299292  | P19157     | GSTP1 MOUSE Glutathione S transferase P 1 OS Mus musculus GN Gstp1 PE 1 SV 2                         |
| Mm.39330   | P48722     | H574L MOUSE Heat shock 70 kDa protein 4L OS Mus musculus GN Hspa4l PE 1 SV 2                         |
| Mm.296181  | P17156     | HSP72 MOUSE Heat shock related 70 kDa protein 2 OS Mus musculus GN Hspa2 PE 1 SV 2                   |
| Mm.235123  | Q8CAQ8     | IMMT MOUSE Mitochondrial inner membrane protein OS Mus musculus GN Immt PE 1 SV 1                    |
| Mm.186499  | Q5RKR3     | ISLR2 MOUSE Immunoglobulin superfamily containing leucine rich repeat protein 2 OS Mus musculus GN I |
| Mm.25594   | P31324     | KAP3 MOUSE cAMP dependent protein kinase type II beta regulatory subunit OS Mus musculus GN Prkar2b  |
| Mm.235182  | Q923T9     | KCC2G MOUSE Calcium calmodulin dependent protein kinase type II subunit gamma OS Mus musculus GN Cam |
| Mm.28023   | Q791V5     | MTCH2 MOUSE Mitochondrial carrier homolog 2 OS Mus musculus GN Mtch2 PE 1 SV 1                       |
| Mm.29513   | Q9Z1P6     | NDUA7 MOUSE NADH dehydrogenase ubiquinone 1 alpha subcomplex subunit 7 OS Mus musculus GN Ndufa7 P   |
| Mm.1222    | P06837     | NEUM MOUSE Neuromodulin OS Mus musculus GN Gap43 PE 1 SV 1                                           |
| Mm.203921  | Q7TQI3     | OTUB1 MOUSE Ubiquitin thioesterase OTUB1 OS Mus musculus GN Otub1 PE 1 SV 2                          |
| Mm.200859  | Q61206     | PA1B2 MOUSE Platelet activating factor acetylhydrolase IB subunit beta OS Mus musculus GN Pfaf1b2 P  |
| Mm.272803  | P57722     | PCBP3 MOUSE Poly rC binding protein 3 OS Mus musculus GN Pcbp3 PE 2 SV 3                             |

|           |        |                                                                                                      |
|-----------|--------|------------------------------------------------------------------------------------------------------|
| Mm.19825  | Q8BGT8 | PHIPL MOUSE Phytanoyl CoA hydroxylase interacting protein like OS Mus musculus GN Phyhipl PE 2 SV 1  |
| Mm.21728  | Q9Z2U0 | PSA7 MOUSE Proteasome subunit alpha type 7 OS Mus musculus GN Psma7 PE 1 SV 1                        |
| Mm.151600 | P62823 | RAB3C MOUSE Ras related protein Rab 3C OS Mus musculus GN Rab3c PE 1 SV 1                            |
| Mm.37380  | Q8CG50 | RAB43 MOUSE Ras related protein Rab 43 OS Mus musculus GN Rab43 PE 1 SV 1                            |
| Mm.490252 | P61294 | RAB6B MOUSE Ras related protein Rab 6B OS Mus musculus GN Rab6b PE 1 SV 1                            |
| Mm.383182 | P32883 | RASK MOUSE GTPase KRas OS Mus musculus GN Kras PE 1 SV 1                                             |
| Mm.290285 | Q8BHD0 | RB39A MOUSE Ras related protein Rab 39A OS Mus musculus GN Rab39a PE 2 SV 1                          |
| Mm.250030 | P35979 | RL12 MOUSE 60S ribosomal protein L12 OS Mus musculus GN Rpl12 PE 1 SV 2                              |
| Mm.252987 | Q91V14 | S12A5 MOUSE Solute carrier family 12 member 5 OS Mus musculus GN Slc12a5 PE 1 SV 2                   |
| Mm.346842 | Q8C650 | SEP10 MOUSE Septin 10 OS Mus musculus GN Sept10 PE 2 SV 1                                            |
| Mm.1682   | P97797 | SHPS1 MOUSE Tyrosine protein phosphatase non receptor type substrate 1 OS Mus musculus GN Sirpa PE 1 |
| Mm.205601 | Q60598 | SRC8 MOUSE Src substrate cortactin OS Mus musculus GN Ctnn PE 1 SV 2                                 |
| Mm.378957 | P54227 | STMN1 MOUSE Stathmin OS Mus musculus GN Strmn1 PE 1 SV 2                                             |
| Mm.328888 | F6SEU4 | SYGP1 MOUSE Ras GTPase activating protein SynGAP OS Mus musculus GN Syngap1 PE 3 SV 2                |
| Mm.200843 | Q91ZZ3 | SYUB MOUSE Beta synuclein OS Mus musculus GN Sncb PE 1 SV 1                                          |
| Mm.1287   | P10637 | TAU MOUSE Microtubule associated protein tau OS Mus musculus GN Mapt PE 1 SV 3                       |
| Mm.439690 | P68369 | TBA1A MOUSE Tubulin alpha 1A chain OS Mus musculus GN Tuba1a PE 1 SV 1                               |
| Mm.229342 | P11983 | TCPA MOUSE T complex protein 1 subunit alpha OS Mus musculus GN Tcp1 PE 1 SV 3                       |
| Mm.328673 | P42932 | TCPQ MOUSE T complex protein 1 subunit theta OS Mus musculus GN Cct8 PE 1 SV 3                       |
| Mm.293233 | Q8QZT1 | THIL MOUSE Acetyl CoA acetyltransferase mitochondrial OS Mus musculus GN Acat1 PE 1 SV 1             |
| Mm.240839 | P21107 | TPM3 MOUSE Tropomyosin alpha 3 chain OS Mus musculus GN Tpm3 PE 1 SV 2                               |
| Mm.371667 | P61089 | UBE2N MOUSE Ubiquitin conjugating enzyme E2 N OS Mus musculus GN Ube2n PE 1 SV 1                     |
| Mm.276618 | Q9Z1G3 | VATC1 MOUSE V type proton ATPase subunit C 1 OS Mus musculus GN Atp6v1c1 PE 1 SV 4                   |
| Mm.311549 | P57746 | VATD MOUSE V type proton ATPase subunit D OS Mus musculus GN Atp6v1d PE 1 SV 1                       |
| Mm.27082  | Q8BVE3 | VATH MOUSE V type proton ATPase subunit H OS Mus musculus GN Atp6v1h PE 1 SV 1                       |
| Mm.101389 | Q8BFR1 | ZCCHL MOUSE Zinc finger CCCH type antiviral protein 1 like OS Mus musculus GN Zc3hav1l PE 2 SV 1     |

**Table 4**

Identification of the differentially expressed proteins in the mouse hippocampus of the tolerance group by qMS - **Downregulated at 3h**

| UniGene ID | UniProt ID | Name, Description                                                                                      |
|------------|------------|--------------------------------------------------------------------------------------------------------|
| Mm.107293  | Q8BFZ3     | ACTBL MOUSE Beta actin like protein 2 OS Mus musculus GN Actbl2 PE 1 SV 1                              |
| Mm.81144   | P57780     | ACTN4 MOUSE Alpha actinin 4 OS Mus musculus GN Actn4 PE 1 SV 1                                         |
| Mm.221298  | P61205     | ARF3 MOUSE ADP ribosylation factor 3 OS Mus musculus GN Arf3 PE 2 SV 2                                 |
| Mm.447553  | P60766     | CDC42 MOUSE Cell division control protein 42 homolog OS Mus musculus GN Cdc42 PE 1 SV 2                |
| Mm.30928   | Q8BH59     | CMC1 MOUSE Calcium binding mitochondrial carrier protein Aralar1 OS Mus musculus GN Slc25a12 PE 1 SV 1 |
| Mm.27732   | Q9EQF6     | DPYL5 MOUSE Dihydropyrimidinase related protein 5 OS Mus musculus GN Dpysl5 PE 1 SV 1                  |
| Mm.471154  | Q6PER3     | MARE3 MOUSE Microtubule associated protein RP EB family member 3 OS Mus musculus GN Mapre3 PE 1 SV 1   |
| Mm.210857  | Q61885     | MOG MOUSE Myelin oligodendrocyte glycoprotein OS Mus musculus GN Mog PE 1 SV 1                         |
| Mm.439702  | P15532     | NDKA MOUSE Nucleoside diphosphate kinase A OS Mus musculus GN Nme1 PE 1 SV 1                           |
| Mm.27842   | P70441     | NHRF1 MOUSE Na H exchange regulatory cofactor NHE RF1 OS Mus musculus GN Slc9a3r1 PE 1 SV 3            |
| Mm.277349  | Q99LX0     | PARK7 MOUSE Protein DJ 1 OS Mus musculus GN Park7 PE 1 SV 1                                            |
| Mm.378993  | P61027     | RAB10 MOUSE Ras related protein Rab 10 OS Mus musculus GN Rab10 PE 1 SV 1                              |
| Mm.41580   | Q9CZT8     | RAB3B MOUSE Ras related protein Rab 3B OS Mus musculus GN Rab3b PE 1 SV 1                              |
| Mm.379375  | Q8BG05     | ROA3 MOUSE Heterogeneous nuclear ribonucleoprotein A3 OS Mus musculus GN Hnrnpa3 PE 1 SV 1             |
| Mm.270259  | O55131     | SEPT7 MOUSE Septin 7 OS Mus musculus GN Sept7 PE 1 SV 1                                                |
| Mm.396243  | O55100     | SNG1 MOUSE Synaptogyrin 1 OS Mus musculus GN Syngr1 PE 1 SV 2                                          |
| Mm.223674  | Q62277     | SYPH MOUSE Synaptophysin OS Mus musculus GN Syp PE 1 SV 2                                              |
| Mm.405359  | P05213     | TBA1B MOUSE Tubulin alpha 1B chain OS Mus musculus GN Tuba1b PE 1 SV 2                                 |
| Mm.88212   | P68373     | TBA1C MOUSE Tubulin alpha 1C chain OS Mus musculus GN Tuba1c PE 1 SV 1                                 |
| Mm.45285   | A2AQ07     | TBB1 MOUSE Tubulin beta 1 chain OS Mus musculus GN Tubb1 PE 1 SV 1                                     |

**Table 5**

Identification of the differentially expressed proteins in the mouse hippocampus of the injury group by qMS - **Upregulated at 24h**

| UniGene ID | UniProt ID | Name, Description                                                                                     |
|------------|------------|-------------------------------------------------------------------------------------------------------|
| Mm.221038  | Q3UHJ0     | AAK1 MOUSE AP2 associated protein kinase 1 OS Mus musculus GN Aak1 PE 1 SV 2                          |
| Mm.686     | P68033     | ACTC MOUSE Actin alpha cardiac muscle 1 OS Mus musculus GN Actc1 PE 1 SV 1                            |
| Mm.284446  | P47738     | ALDH2 MOUSE Aldehyde dehydrogenase mitochondrial OS Mus musculus GN Aldh2 PE 1 SV 1                   |
| Mm.271178  | Q9CQW2     | ARL8B MOUSE ADP ribosylation factor like protein 8B OS Mus musculus GN Arl8b PE 2 SV 1                |
| Mm.150319  | Q641P0     | ARP3B MOUSE Actin related protein 3B OS Mus musculus GN Actr3b PE 2 SV 1                              |
| Mm.394300  | Q8BLQ9     | CADM2 MOUSE Cell adhesion molecule 2 OS Mus musculus GN Cadm2 PE 1 SV 2                               |
| Mm.203965  | Q6ZQ38     | CAND1 MOUSE Cullin associated NEDD8 dissociated protein 1 OS Mus musculus GN Cand1 PE 2 SV 2          |
| Mm.19142   | P47753     | CAZA1 MOUSE F actin capping protein subunit alpha 1 OS Mus musculus GN Capza1 PE 1 SV 4               |
| Mm.31395   | Q00493     | CBPE MOUSE Carboxypeptidase E OS Mus musculus GN Cpe PE 1 SV 2                                        |
| Mm.806     | P35762     | CD81 MOUSE CD81 antigen OS Mus musculus GN Cd81 PE 1 SV 1                                             |
| Mm.44220   | Q9QXT0     | CNPY2 MOUSE Protein canopy homolog 2 OS Mus musculus GN Cnpy2 PE 2 SV 1                               |
| Mm.23692   | Q60737     | CSK21 MOUSE Casein kinase II subunit alpha OS Mus musculus GN Csnk2a1 PE 1 SV 2                       |
| Mm.378921  | P23242     | CXA1 MOUSE Gap junction alpha 1 protein OS Mus musculus GN Gja1 PE 1 SV 2                             |
| Mm.472264  | Q9JLM8     | DCLK1 MOUSE Serine threonine protein kinase DCLK1 OS Mus musculus GN Dclk1 PE 1 SV 1                  |
| Mm.210863  | Q9WV69     | DEMA MOUSE Dematin OS Mus musculus GN Epb49 PE 1 SV 1                                                 |
| Mm.246436  | Q9D0M5     | DYL2 MOUSE Dynein light chain 2 cytoplasmic OS Mus musculus GN Dynll2 PE 1 SV 1                       |
| Mm.5305    | P68040     | GBLP MOUSE Guanine nucleotide binding protein subunit beta 2 like 1 OS Mus musculus GN Gnb2l1 PE 1 S  |
| Mm.102080  | Q8VE33     | GD1L1 MOUSE Ganglioside induced differentiation associated protein 1 like 1 OS Mus musculus GN Gdap1  |
| Mm.393508  | O70443     | GNAZ MOUSE Guanine nucleotide binding protein G z subunit alpha OS Mus musculus GN Gnaz PE 2 SV 4     |
| Mm.282351  | P48774     | GSTM5 MOUSE Glutathione S transferase Mu 5 OS Mus musculus GN Gstm5 PE 1 SV 1                         |
| Mm.193539  | P15864     | H12 MOUSE Histone H1 2 OS Mus musculus GN Hist1h1c PE 1 SV 2                                          |
| Mm.245931  | P27661     | H2AX MOUSE Histone H2A x OS Mus musculus GN H2afx PE 1 SV 2                                           |
| Mm.378937  | Q9R257     | HEBP1 MOUSE Heme binding protein 1 OS Mus musculus GN Hebp1 PE 1 SV 1                                 |
| Mm.279821  | P60843     | IF4A1 MOUSE Eukaryotic initiation factor 4A I OS Mus musculus GN Eif4a1 PE 2 SV 1                     |
| Mm.246466  | Q6WVG3     | KCD12 MOUSE BTB POZ domain containing protein KCTD12 OS Mus musculus GN Kctd12 PE 1 SV 1              |
| Mm.16563   | P00342     | LDHC MOUSE L lactate dehydrogenase C chain OS Mus musculus GN Ldhc PE 1 SV 2                          |
| Mm.298251  | Q9JIA1     | LGI1 MOUSE Leucine rich glioma inactivated protein 1 OS Mus musculus GN Lgi1 PE 1 SV 1                |
| Mm.334011  | Q8BMF3     | MAON MOUSE NADP dependent malic enzyme mitochondrial OS Mus musculus GN Me3 PE 1 SV 2                 |
| Mm.248907  | P31938     | MP2K1 MOUSE Dual specificity mitogen activated protein kinase kinase 1 OS Mus musculus GN Map2k1 PE   |
| Mm.27570   | Q9CQZ5     | NDUA6 MOUSE NADH dehydrogenase ubiquinone 1 alpha subcomplex subunit 6 OS Mus musculus GN Ndufa6 P    |
| Mm.279823  | Q9D8B4     | NDUAB MOUSE NADH dehydrogenase ubiquinone 1 alpha subcomplex subunit 11 OS Mus musculus GN Ndufa11    |
| Mm.375824  | Q99LY9     | NDU55 MOUSE NADH dehydrogenase ubiquinone iron sulfur protein 5 OS Mus musculus GN Ndufs5 PE 1 SV     |
| Mm.317293  | Q80Z24     | NEGR1 MOUSE Neuronal growth regulator 1 OS Mus musculus GN Negr1 PE 1 SV 1                            |
| Mm.326702  | Q810U3     | NFASC MOUSE Neurofascin OS Mus musculus GN Nfasc PE 1 SV 1                                            |
| Mm.208439  | Q810U4     | NRCAM MOUSE Neuronal cell adhesion molecule OS Mus musculus GN Nrcam PE 1 SV 2                        |
| Mm.490272  | Q60597     | ODO1 MOUSE 2 oxoglutarate dehydrogenase mitochondrial OS Mus musculus GN Ogdh PE 1 SV 3               |
| Mm.296221  | Q9D2G2     | ODO2 MOUSE Dihydrodipicolylsine residue succinyltransferase component of 2 oxoglutarate dehydrogenase |
| Mm.544     | Q62048     | PEA15 MOUSE Astrocytic phosphoprotein PEA 15 OS Mus musculus GN Pea15 PE 1 SV 1                       |
| Mm.36241   | O35129     | PHB2 MOUSE Prohibitin 2 OS Mus musculus GN Phb2 PE 1 SV 1                                             |
| Mm.274432  | P48453     | PP2BB MOUSE Serine threonine protein phosphatase 2B catalytic subunit beta isoform OS Mus musculus G  |
| Mm.29824   | Q11011     | PSA MOUSE Puromycin sensitive aminopeptidase OS Mus musculus GN Npepps PE 1 SV 2                      |
| Mm.30210   | Q9QUM9     | PSA6 MOUSE Proteasome subunit alpha type 6 OS Mus musculus GN Psma6 PE 1 SV 1                         |
| Mm.151600  | P62823     | RAB3C MOUSE Ras related protein Rab 3C OS Mus musculus GN Rab3c PE 1 SV 1                             |

|           |        |                                                                                                    |
|-----------|--------|----------------------------------------------------------------------------------------------------|
| Mm.305750 | P14115 | RL27A MOUSE 60S ribosomal protein L27a OS Mus musculus GN Rpl27a PE 2 SV 5                         |
| Mm.380435 | P99027 | RLA2 MOUSE 60S acidic ribosomal protein P2 OS Mus musculus GN Rplp2 PE 1 SV 3                      |
| Mm.246990 | Q9E997 | RTN3 MOUSE Reticulon 3 OS Mus musculus GN Rtn3 PE 1 SV 2                                           |
| Mm.5260   | P31648 | SC6A1 MOUSE Sodium and chloride dependent GABA transporter 1 OS Mus musculus GN Slc6a1 PE 1 SV 2   |
| Mm.33343  | Q8R3V5 | SHLB2 MOUSE Endophilin B2 OS Mus musculus GN Sh3glb2 PE 2 SV 2                                     |
| Mm.10     | Q64674 | SPEE MOUSE Spermidine synthase OS Mus musculus GN Srm PE 2 SV 1                                    |
| Mm.393311 | Q8BWF0 | SSDH MOUSE Succinate semialdehyde dehydrogenase mitochondrial OS Mus musculus GN Aldh5a1 PE 1 SV 1 |
| Mm.328888 | F6SEU4 | SYGP1 MOUSE Ras GTPase activating protein SynGAP OS Mus musculus GN Syngap1 PE 3 SV 2              |
| Mm.5102   | P46097 | SYT2 MOUSE Synaptotagmin 2 OS Mus musculus GN Syt2 PE 1 SV 1                                       |
| Mm.24183  | Q9R1Q8 | TAGL3 MOUSE Transgelin 3 OS Mus musculus GN Tagln3 PE 1 SV 1                                       |
| Mm.405359 | P05213 | TBA1B MOUSE Tubulin alpha 1B chain OS Mus musculus GN Tuba1b PE 1 SV 2                             |
| Mm.379227 | Q9CWF2 | TBB2B MOUSE Tubulin beta 2B chain OS Mus musculus GN Tubb2b PE 1 SV 1                              |
| Mm.213292 | Q9CZW5 | TOM70 MOUSE Mitochondrial import receptor subunit TOM70 OS Mus musculus GN Tomm70a PE 1 SV 2       |
| Mm.136648 | Q9CYZ2 | TPD54 MOUSE Tumor protein D54 OS Mus musculus GN Tpd52l2 PE 1 SV 1                                 |
| Mm.274346 | Q9Z0P5 | TWF2 MOUSE Twinfilin 2 OS Mus musculus GN Twf2 PE 1 SV 1                                           |
| Mm.27082  | Q8BVE3 | VATH MOUSE V type proton ATPase subunit H OS Mus musculus GN Atp6v1h PE 1 SV 1                     |



**Table 6**

Identification of the differentially expressed proteins in the mouse hippocampus of the injury group by qMS - **Downregulated at 24h**

| UniGene ID | UniProt ID | Name, Description                                                                                     |
|------------|------------|-------------------------------------------------------------------------------------------------------|
| Mm.34319   | Q9CQV8     | 1433B MOUSE 14 3 3 protein beta alpha OS Mus musculus GN Ywhab PE 1 SV 3                              |
| Mm.234700  | P62259     | 1433E MOUSE 14 3 3 protein epsilon OS Mus musculus GN Ywhae PE 1 SV 1                                 |
| Mm.409488  | P68510     | 1433F MOUSE 14 3 3 protein eta OS Mus musculus GN Ywhah PE 1 SV 2                                     |
| Mm.289630  | P68254     | 1433T MOUSE 14 3 3 protein theta OS Mus musculus GN Ywhaq PE 1 SV 1                                   |
| Mm.107293  | Q8BFZ3     | ACTBL MOUSE Beta actin like protein 2 OS Mus musculus GN Actbl2 PE 1 SV 1                             |
| Mm.28521   | Q8R5C5     | ACTY MOUSE Beta contractin OS Mus musculus GN Actr1b PE 1 SV 1                                        |
| Mm.227583  | O55143     | AT2A2 MOUSE Sarcoplasmic endoplasmic reticulum calcium ATPase 2 OS Mus musculus GN At2a2 PE 1 SV 2    |
| Mm.274540  | Q3UHL1     | CAMKV MOUSE CaM kinase like vesicle associated protein OS Mus musculus GN Camkv PE 1 SV 2             |
| Mm.58836   | Q9CZU6     | CISY MOUSE Citrate synthase mitochondrial OS Mus musculus GN Cs PE 1 SV 1                             |
| Mm.298875  | O08585     | CLCA MOUSE Clathrin light chain A OS Mus musculus GN Clta PE 1 SV 1                                   |
| Mm.290026  | Q6IRU5     | CLCB MOUSE Clathrin light chain B OS Mus musculus GN Cltb PE 2 SV 1                                   |
| Mm.298947  | O35215     | DOPD MOUSE D dopachrome decarboxylase OS Mus musculus GN Ddt PE 1 SV 3                                |
| Mm.441620  | Q8BZ98     | DYN3 MOUSE Dynamin 3 OS Mus musculus GN Dnm3 PE 1 SV 1                                                |
| Mm.254629  | B2RSH2     | GNAI1 MOUSE Guanine nucleotide binding protein G i subunit alpha 1 OS Mus musculus GN Gnai1 PE 2 SV 5 |
| Mm.170587  | P43274     | H14 MOUSE Histone H1 4 OS Mus musculus GN Hist1h1e PE 1 SV 2                                          |
| Mm.262527  | Q8CGP6     | H2A1H MOUSE Histone H2A type 1 H OS Mus musculus GN Hist1h2ah PE 1 SV 3                               |
| Mm.14287   | P16627     | HS71L MOUSE Heat shock 70 kDa protein 1 like OS Mus musculus GN Hspa1l PE 2 SV 4                      |
| Mm.397111  | P63005     | LIS1 MOUSE Platelet activating factor acetylhydrolase IB subunit alpha OS Mus musculus GN Pafah1b1 P  |
| Mm.5246    | P17742     | PPIA MOUSE Peptidyl prolyl cis trans isomerase A OS Mus musculus GN Ppia PE 1 SV 2                    |
| Mm.378993  | P61027     | RAB10 MOUSE Ras related protein Rab 10 OS Mus musculus GN Rab10 PE 1 SV 1                             |
| Mm.41580   | Q9CZT8     | RAB3B MOUSE Ras related protein Rab 3B OS Mus musculus GN Rab3b PE 1 SV 1                             |
| Mm.155896  | O88569     | ROA2 MOUSE Heterogeneous nuclear ribonucleoproteins A2 B1 OS Mus musculus GN Hnrnpa2b1 PE 1 SV 2      |
| Mm.258633  | Q60864     | STIP1 MOUSE Stress induced phosphoprotein 1 OS Mus musculus GN Stip1 PE 1 SV 1                        |
| Mm.439759  | P61264     | STX1B MOUSE Syntaxin 1B OS Mus musculus GN Stx1b PE 1 SV 1                                            |
| Mm.29845   | Q9WUM5     | SUCA MOUSE Succinyl CoA ligase ADP GDP forming subunit alpha mitochondrial OS Mus musculus GN Suc     |
| Mm.187079  | Q8CHC4     | SYNJ1 MOUSE Synaptotagmin 1 OS Mus musculus GN Synj1 PE 1 SV 3                                        |
| Mm.223674  | Q62277     | SYPH MOUSE Synaptophysin OS Mus musculus GN Syp PE 1 SV 2                                             |
| Mm.7420    | Q9D6F9     | TBB4A MOUSE Tubulin beta 4A chain OS Mus musculus GN Tubb4a PE 1 SV 3                                 |
| Mm.328673  | P42932     | TCPQ MOUSE T complex protein 1 subunit theta OS Mus musculus GN Cct8 PE 1 SV 3                        |
| Mm.1104    | Q02053     | UBA1 MOUSE Ubiquitin like modifier activating enzyme 1 OS Mus musculus GN Uba1 PE 1 SV 1              |
| Mm.29807   | Q9R0P9     | UCHL1 MOUSE Ubiquitin carboxyl terminal hydrolase isozyme L1 OS Mus musculus GN Uchl1 PE 1 SV 1       |
| Mm.101389  | Q8BFR1     | ZCCHL MOUSE Zinc finger CCCH type antiviral protein 1 like OS Mus musculus GN Zc3hav1l PE 2 SV 1      |

**Table 7**

Identification of the differentially expressed proteins in the mouse hippocampus of the tolerance group by qMS - **Upregulated at 24h**

| UniGene ID | UniProt ID | Name, Description                                                                                    |
|------------|------------|------------------------------------------------------------------------------------------------------|
| Mm.3118    | P61164     | ACTZ MOUSE Alpha centractin OS Mus musculus GN Actr1a PE 2 SV 1                                      |
| Mm.389075  | P84084     | ARF5 MOUSE ADP ribosylation factor 5 OS Mus musculus GN Arf5 PE 2 SV 2                               |
| Mm.174998  | Q8VEH3     | ARL8A MOUSE ADP ribosylation factor like protein 8A OS Mus musculus GN Arl8a PE 2 SV 1               |
| Mm.197534  | Q8BKX1     | BAIP2 MOUSE Brain specific angiogenesis inhibitor 1 associated protein 2 OS Mus musculus GN Baiap2 P |
| Mm.2755    | Q08331     | CALB2 MOUSE Calretinin OS Mus musculus GN Calb2 PE 1 SV 3                                            |
| Mm.1971    | P14211     | CALR MOUSE Calreticulin OS Mus musculus GN Calr PE 1 SV 1                                            |
| Mm.128627  | Q8R1Q8     | DC1L1 MOUSE Cytoplasmic dynein 1 light intermediate chain 1 OS Mus musculus GN Dync1l1 PE 1 SV 1     |
| Mm.250414  | O35098     | DPYL4 MOUSE Dihydropyrimidinase related protein 4 OS Mus musculus GN Dpysl4 PE 1 SV 1                |
| Mm.278458  | P26883     | FKB1A MOUSE Peptidyl prolyl cis trans isomerase FKBP1A OS Mus musculus GN Fkbp1a PE 1 SV 2           |
| Mm.436562  | Q64467     | G3PT MOUSE Glyceraldehyde 3 phosphate dehydrogenase testis specific OS Mus musculus GN Gapdhs PE 1   |
| Mm.41737   | P63213     | GBG2 MOUSE Guanine nucleotide binding protein G I G S G O subunit gamma 2 OS Mus musculus GN Gng2    |
| Mm.1239    | P03995     | GFAP MOUSE Glial fibrillary acidic protein OS Mus musculus GN Gfap PE 1 SV 4                         |
| Mm.394930  | Q9WV60     | GSK3B MOUSE Glycogen synthase kinase 3 beta OS Mus musculus GN Gsk3b PE 1 SV 2                       |
| Mm.8048    | Q07133     | H1T MOUSE Histone H1t OS Mus musculus GN Hist1h1t PE 2 SV 4                                          |
| Mm.14287   | P16627     | HS71L MOUSE Heat shock 70 kDa protein 1 like OS Mus musculus GN Hspa1l PE 2 SV 4                     |
| Mm.240965  | Q80TL4     | K1045 MOUSE Protein KIAA1045 OS Mus musculus GN Kiaa1045 PE 1 SV 2                                   |
| Mm.397111  | P63005     | LIS1 MOUSE Platelet activating factor acetylhydrolase IB subunit alpha OS Mus musculus GN Pfah1b1 P  |
| Mm.210857  | Q61885     | MOG MOUSE Myelin oligodendrocyte glycoprotein OS Mus musculus GN Mog PE 1 SV 1                       |
| Mm.200859  | Q61206     | PA1B2 MOUSE Platelet activating factor acetylhydrolase IB subunit beta OS Mus musculus GN Pfah1b2 P  |
| Mm.456635  | P62141     | PP1B MOUSE Serine threonine protein phosphatase PP1 beta catalytic subunit OS Mus musculus GN Ppp1cb |
| Mm.295252  | Q9CR16     | PPID MOUSE Peptidyl prolyl cis trans isomerase D OS Mus musculus GN Ppid PE 1 SV 3                   |
| Mm.208883  | Q9Z2U1     | PSA5 MOUSE Proteasome subunit alpha type 5 OS Mus musculus GN Psma5 PE 1 SV 1                        |
| Mm.482241  | P42669     | PURA MOUSE Transcriptional activator protein Pur alpha OS Mus musculus GN Pura PE 1 SV 1             |
| Mm.27806   | Q9WUB3     | PYGM MOUSE Glycogen phosphorylase muscle form OS Mus musculus GN Pygm PE 1 SV 3                      |
| Mm.32870   | P59279     | RAB2B MOUSE Ras related protein Rab 2B OS Mus musculus GN Rab2b PE 2 SV 1                            |
| Mm.260157  | P35276     | RAB3D MOUSE Ras related protein Rab 3D OS Mus musculus GN Rab3d PE 1 SV 1                            |
| Mm.482114  | Q91ZR1     | RAB4B MOUSE Ras related protein Rab 4B OS Mus musculus GN Rab4b PE 2 SV 2                            |
| Mm.27348   | P63321     | RALA MOUSE Ras related protein Ral A OS Mus musculus GN Rala PE 1 SV 1                               |
| Mm.261448  | Q80ZJ1     | RAP2A MOUSE Ras related protein Rap 2a OS Mus musculus GN Rap2a PE 1 SV 2                            |
| Mm.45148   | Q8BHC1     | RB39B MOUSE Ras related protein Rab 39B OS Mus musculus GN Rab39b PE 2 SV 1                          |
| Mm.397450  | P14148     | RL7 MOUSE 60S ribosomal protein L7 OS Mus musculus GN Rpl7 PE 2 SV 2                                 |
| Mm.298745  | P62270     | RS18 MOUSE 40S ribosomal protein S18 OS Mus musculus GN Rps18 PE 1 SV 3                              |
| Mm.399829  | P97351     | RS3A MOUSE 40S ribosomal protein S3a OS Mus musculus GN Rps3a PE 1 SV 3                              |
| Mm.159143  | Q9DA97     | SEP14 MOUSE Septin 14 OS Mus musculus GN Sept14 PE 2 SV 2                                            |
| Mm.134191  | Q99JR1     | SFXN1 MOUSE Sideroflexin 1 OS Mus musculus GN Sfxn1 PE 1 SV 3                                        |
| Mm.104540  | Q9DB05     | SNAA MOUSE Alpha soluble NSF attachment protein OS Mus musculus GN Napa PE 1 SV 1                    |
| Mm.273053  | P47758     | SRPRB MOUSE Signal recognition particle receptor subunit beta OS Mus musculus GN Srprb PE 1 SV 1     |
| Mm.187079  | Q8CHC4     | SYNJ1 MOUSE Synaptojanin 1 OS Mus musculus GN Synj1 PE 1 SV 3                                        |
| Mm.430772  | Q9QZM0     | UBQL2 MOUSE Ubiquilin 2 OS Mus musculus GN Ubqln2 PE 1 SV 2                                          |
| Mm.28643   | P63044     | VAMP2 MOUSE Vesicle associated membrane protein 2 OS Mus musculus GN Vamp2 PE 1 SV 2                 |
| Mm.260456  | Q9QY76     | VAPB MOUSE Vesicle associated membrane protein associated protein B OS Mus musculus GN Vapb PE 2 SV  |
| Mm.276618  | Q9Z1G3     | VATC1 MOUSE V type proton ATPase subunit C 1 OS Mus musculus GN Atp6v1c1 PE 1 SV 4                   |
| Mm.406120  | O88342     | WDR1 MOUSE WD repeat containing protein 1 OS Mus musculus GN Wdr1 PE 1 SV 3                          |
| Mm.298132  | Q8BGF3     | WDR92 MOUSE WD repeat containing protein 92 OS Mus musculus GN Wdr92 PE 2 SV 1                       |

**Table 8**

Identification of the differentially expressed proteins in the mouse hippocampus of the tolerance group by qMS - **Downregulated at 24h**

| UniGene ID | UniProt ID | Name, Description                                                                                |
|------------|------------|--------------------------------------------------------------------------------------------------|
| Mm.686     | P68033     | ACTC MOUSE Actin alpha cardiac muscle 1 OS Mus musculus GN Actc1 PE 1 SV 1                       |
| Mm.290482  | O89053     | COR1A MOUSE Coronin 1A OS Mus musculus GN Coro1a PE 1 SV 5                                       |
| Mm.7286    | O88712     | CTBP1 MOUSE C terminal binding protein 1 OS Mus musculus GN Ctbp1 PE 1 SV 2                      |
| Mm.433257  | P39054     | DYN2 MOUSE Dynamin 2 OS Mus musculus GN Dnm2 PE 1 SV 2                                           |
| Mm.21740   | O35737     | HNRH1 MOUSE Heterogeneous nuclear ribonucleoprotein H OS Mus musculus GN Hnrnh1 PE 1 SV 3        |
| Mm.6388    | Q61696     | HS71A MOUSE Heat shock 70 kDa protein 1A OS Mus musculus GN Hspa1a PE 1 SV 2                     |
| Mm.251013  | P70168     | IMB1 MOUSE Importin subunit beta 1 OS Mus musculus GN Kpnb1 PE 1 SV 2                            |
| Mm.235123  | Q8CAQ8     | IMMT MOUSE Mitochondrial inner membrane protein OS Mus musculus GN Immt PE 1 SV 1                |
| Mm.269649  | P12382     | K6PL MOUSE 6 phosphofructokinase liver type OS Mus musculus GN Pfk1 PE 1 SV 4                    |
| Mm.28023   | Q791V5     | MTCH2 MOUSE Mitochondrial carrier homolog 2 OS Mus musculus GN Mtch2 PE 1 SV 1                   |
| Mm.490272  | Q60597     | ODO1 MOUSE 2 oxoglutarate dehydrogenase mitochondrial OS Mus musculus GN Ogdh PE 1 SV 3          |
| Mm.206159  | Q8K183     | PDXK MOUSE Pyridoxal kinase OS Mus musculus GN Pdxk PE 1 SV 1                                    |
| Mm.4598    | Q61361     | PGCB MOUSE Brevican core protein OS Mus musculus GN Bcan PE 1 SV 2                               |
| Mm.217764  | Q9D0F9     | PGM1 MOUSE Phosphoglucomutase 1 OS Mus musculus GN Pgm1 PE 1 SV 4                                |
| Mm.5260    | P31648     | SC6A1 MOUSE Sodium and chloride dependent GABA transporter 1 OS Mus musculus GN Slc6a1 PE 1 SV 2 |
| Mm.42944   | Q9WTX5     | SKP1 MOUSE S phase kinase associated protein 1 OS Mus musculus GN Skp1 PE 1 SV 3                 |
| Mm.5102    | P46097     | SYT2 MOUSE Synaptotagmin 2 OS Mus musculus GN Syt2 PE 1 SV 1                                     |
| Mm.200843  | Q91Z23     | SYUB MOUSE Beta synuclein OS Mus musculus GN Sncb PE 1 SV 1                                      |
| Mm.29182   | Q93092     | TALDO MOUSE Transaldolase OS Mus musculus GN Taldo1 PE 1 SV 2                                    |
| Mm.439690  | P68369     | TBA1A MOUSE Tubulin alpha 1A chain OS Mus musculus GN Tuba1a PE 1 SV 1                           |
| Mm.405359  | P05213     | TBA1B MOUSE Tubulin alpha 1B chain OS Mus musculus GN Tuba1b PE 1 SV 2                           |
| Mm.27082   | Q8BVE3     | VATH MOUSE V type proton ATPase subunit H OS Mus musculus GN Atp6v1h PE 1 SV 1                   |

**Proteomic analysis after status epilepticus identifies UCHL1 as protective against hippocampal injury** (Neurochemical Research)

James P. Reynolds, Eva M. Jimenez-Mateos, Li Cao, Fang Bian, Mariana Alves, Suzanne F. Miller-Delaney, An Zhou, David C. Henshall\*

\*Corresponding author: dhenshall@rcsi.ie

Department of Physiology and Medical Physics, Royal College of Surgeons in Ireland, 123 St. Stephen's Green, Dublin 2, Ireland

**Contents, Supplementary File 2**

Source data for Figure 2

|                    |                                                                                      |
|--------------------|--------------------------------------------------------------------------------------|
| Figure 2-1, page 2 | GOstat analysis, up- and down-regulated proteins following injury, sampled at 3h     |
| Figure 2-2, page 4 | GOstat analysis, up- and down-regulated proteins following injury, sampled at 24h    |
| Figure 2-3, page 6 | GOstat analysis, up- and down-regulated proteins following tolerance, sampled at 3h  |
| Figure 2-4, page 8 | GOstat analysis, up- and down-regulated proteins following tolerance, sampled at 24h |











**Figure 2-3 - Source data file for Figure 2**

**GStat analysis, for up-and-down-regulated proteins (±30%) following treatment (T0), sampled at 3h**  
 performed online at <http://gostat.wehi.edu.au/cg-bin/gostat.pl>

**Search parameters**

Against default GO database  
 used database MGI (see <http://geneontology.org/gene-associations/readme/mgi.README>)  
 minimal length of GO path 3  
 Subset Biological Process (BP), Cellular Component (CC), Molecular Function (MF)  
 maximum p-value 50  
 maximum number of GOs over/under  
 representation no  
 clustered no  
 multiple test FDR (Benjamini)

**Datasets run**  
 T0 +30 (3h) 5769  
 T0 -30 (3h) 1820  
**Successful annotations by Gostat**  
 5769  
 1820  
**Success following manual re-annotation\***  
 6359  
 2020  
 (\*using DAVID and Uniprot)

**T0 Up 3h BP**

| Best GOs (Max 50)          | GO term                                                               | Genes                                                  | Count | Total | P-Value  | Gene | Search Term | GOs                   |
|----------------------------|-----------------------------------------------------------------------|--------------------------------------------------------|-------|-------|----------|------|-------------|-----------------------|
| <a href="#">GO:0001914</a> | protein transport                                                     | atp6v1d atp6a atp6b1c1 atp2aa6v1h                      | 63    | 18253 | 3.42E-04 | aat1 | Mm22108     | GO:000468 GO:0008150  |
| <a href="#">GO:0006918</a> | hydrogen transport                                                    | atp6v1d atp6a atp6b1c1 atp2aa6v1h                      | 5     | 58    | 0.00042  | aat1 | Mm22108     | GO:000468 GO:0008150  |
| <a href="#">GO:0001914</a> | oxidative phosphorylation                                             | atp6v1d atp6a atp6b1c1 atp2aa6v1h                      | 4     | 51    | 0.0002   | aat1 | Mm22108     | GO:000468 GO:0008150  |
| <a href="#">GO:007010</a>  | cytoskeleton organization and biogenesis                              | epq4-10 naa cat tuba1a krasraspa mapt smn1             | 8     | 447   | 0.00077  | aat1 | Mm22446     | GO:0008152 GO:0008153 |
| <a href="#">GO:0006918</a> | energy coupled proton transport, down electrochemical gradient        | atp6v1d atp6a atp6b1c1 atp2aa6v1h                      | 3     | 31    | 0.00077  | aat1 | Mm22108     | GO:000468 GO:0008150  |
| <a href="#">GO:041946</a>  | ATP synthesis coupled proton transport                                | atp6v1d atp6a atp6b1c1 atp2aa6v1h                      | 3     | 31    | 0.00077  | aat1 | Mm22108     | GO:000468 GO:0008150  |
| <a href="#">GO:041919</a>  | localization                                                          | atp6a atp2 aa6v1h atp6b1c1 atp2aa6v1h                  | 20    | 2619  | 0.00077  | aat1 | Mm22108     | GO:000468 GO:0008150  |
| <a href="#">GO:0006918</a> | coenzyme metabolic process                                            | 3 ac12a6 ywhag adm1                                    | 5     | 159   | 0.0106   | aat1 | Mm22108     | GO:000468 GO:0008150  |
| <a href="#">GO:0007474</a> | ATP biosynthetic process                                              | atp6v1d atp6a atp6b1c1 atp2aa6v1h                      | 3     | 36    | 0.0108   | aat1 | Mm22108     | GO:000468 GO:0008150  |
| <a href="#">GO:0006918</a> | nucleoside phosphate metabolic process                                | atp6v1d atp6a atp6b1c1 atp2aa6v1h                      | 3     | 36    | 0.0108   | aat1 | Mm22108     | GO:000468 GO:0008150  |
| <a href="#">GO:0030306</a> | cortical actin cytoskeleton organization and biogenesis               | epq4-10 cat                                            | 2     | 8     | 0.0111   | aat1 | Mm22446     | GO:0008152 GO:0008153 |
| <a href="#">GO:0006918</a> | ATP metabolic process                                                 | atp6v1d atp6a atp6b1c1 atp2aa6v1h                      | 3     | 36    | 0.0111   | aat1 | Mm22108     | GO:000468 GO:0008150  |
| <a href="#">GO:0019142</a> | monovent inorganic cation transport                                   | atp6v1d atp6a atp6b1c1 atp2aa6v1h                      | 6     | 286   | 0.0111   | aat1 | Mm22108     | GO:000468 GO:0008150  |
| <a href="#">GO:0006918</a> | cofactor metabolic process                                            | atp6v1d atp6a atp6b1c1 atp2aa6v1h                      | 6     | 187   | 0.0111   | aat1 | Mm22108     | GO:000468 GO:0008150  |
| <a href="#">GO:0006918</a> | ribonucleoside triphosphate biosynthetic process                      | atp6v1d atp6a atp6b1c1 atp2aa6v1h                      | 3     | 45    | 0.0111   | aat1 | Mm22108     | GO:000468 GO:0008150  |
| <a href="#">GO:0006918</a> | purine nucleoside triphosphate biosynthetic process                   | atp6v1d atp6a atp6b1c1 atp2aa6v1h                      | 3     | 45    | 0.0111   | aat1 | Mm22108     | GO:000468 GO:0008150  |
| <a href="#">GO:0006918</a> | purine nucleoside triphosphate biosynthetic process                   | atp6v1d atp6a atp6b1c1 atp2aa6v1h                      | 3     | 45    | 0.0111   | aat1 | Mm22108     | GO:000468 GO:0008150  |
| <a href="#">GO:0006918</a> | cofactor biosynthesis and biogenesis                                  | epq4-10 naa cat                                        | 2     | 10    | 0.0111   | aat1 | Mm22446     | GO:0008152 GO:0008153 |
| <a href="#">GO:0006918</a> | nucleoside triphosphate biosynthetic process                          | atp6v1d atp6a atp6b1c1 atp2aa6v1h                      | 3     | 48    | 0.0111   | aat1 | Mm22108     | GO:000468 GO:0008150  |
| <a href="#">GO:041814</a>  | regulation of long-term neuronal synaptic plasticity                  | syngap1 kras                                           | 2     | 11    | 0.0111   | aat1 | Mm22108     | GO:000468 GO:0008150  |
| <a href="#">GO:0031111</a> | negative regulation of microtubule polymerisation or depolymerisation | mapt smn1                                              | 2     | 11    | 0.0111   | aat1 | Mm22108     | GO:000468 GO:0008150  |
| <a href="#">GO:0007015</a> | microtubule depolymerisation                                          | mapt smn1                                              | 2     | 11    | 0.0111   | aat1 | Mm22108     | GO:000468 GO:0008150  |
| <a href="#">GO:0006918</a> | purine nucleoside triphosphate metabolic process                      | syngap1 pkrab2 kras                                    | 3     | 49    | 0.0111   | aat1 | Mm22108     | GO:000468 GO:0008150  |
| <a href="#">GO:0007474</a> | learning                                                              | syngap1 pkrab2 kras                                    | 3     | 49    | 0.0111   | aat1 | Mm22108     | GO:000468 GO:0008150  |
| <a href="#">GO:0006918</a> | ribonucleoside triphosphate metabolic process                         | atp6v1d atp6a atp6b1c1 atp2aa6v1h                      | 3     | 50    | 0.0111   | aat1 | Mm22108     | GO:000468 GO:0008150  |
| <a href="#">GO:0006918</a> | purine nucleoside triphosphate metabolic process                      | atp6v1d atp6a atp6b1c1 atp2aa6v1h                      | 3     | 51    | 0.0115   | aat1 | Mm22108     | GO:000468 GO:0008150  |
| <a href="#">GO:0006918</a> | group transfer coenzyme metabolic process                             | atp6v1d atp6a atp6b1c1 atp2aa6v1h                      | 3     | 54    | 0.0128   | aat1 | Mm22108     | GO:000468 GO:0008150  |
| <a href="#">GO:0031110</a> | regulation of microtubule polymerisation or depolymerisation          | mapt smn1                                              | 2     | 13    | 0.0129   | aat1 | Mm22108     | GO:000468 GO:0008150  |
| <a href="#">GO:0007474</a> | nucleoside triphosphate metabolic process                             | atp6v1d atp6a atp6b1c1 atp2aa6v1h                      | 3     | 56    | 0.0129   | aat1 | Mm22108     | GO:000468 GO:0008150  |
| <a href="#">GO:0006918</a> | cation transport                                                      | atp6v1d atp6a atp6b1c1 atp2aa6v1h                      | 7     | 459   | 0.0129   | aat1 | Mm22108     | GO:000468 GO:0008150  |
| <a href="#">GO:0006918</a> | purine nucleoside triphosphate biosynthetic process                   | atp6v1d atp6a atp6b1c1 atp2aa6v1h                      | 3     | 57    | 0.0129   | aat1 | Mm22108     | GO:000468 GO:0008150  |
| <a href="#">GO:0031110</a> | microtubule polymerisation or depolymerisation                        | mapt smn1                                              | 2     | 14    | 0.0129   | aat1 | Mm22108     | GO:000468 GO:0008150  |
| <a href="#">GO:0006918</a> | regulation of neuronal synaptic plasticity                            | syngap1 kras                                           | 2     | 14    | 0.0129   | aat1 | Mm22108     | GO:000468 GO:0008150  |
| <a href="#">GO:0006918</a> | cellular TCR mediated signal transduction                             | rab34a syngap1 grn12 krasrasb3                         | 3     | 81    | 0.0144   | aat1 | Mm22108     | GO:000468 GO:0008150  |
| <a href="#">GO:0006918</a> | ribonucleoside biosynthetic process                                   | atp6v1d atp6a atp6b1c1 atp2aa6v1h                      | 3     | 81    | 0.0144   | aat1 | Mm22108     | GO:000468 GO:0008150  |
| <a href="#">GO:0006918</a> | purine nucleoside biosynthetic process                                | atp6v1d atp6a atp6b1c1 atp2aa6v1h                      | 3     | 81    | 0.0144   | aat1 | Mm22108     | GO:000468 GO:0008150  |
| <a href="#">GO:0006918</a> | purine nucleoside biosynthetic process                                | atp6v1d atp6a atp6b1c1 atp2aa6v1h                      | 3     | 85    | 0.0154   | aat1 | Mm22108     | GO:000468 GO:0008150  |
| <a href="#">GO:0006918</a> | learning and memory                                                   | syngap1 pkrab2 kras                                    | 3     | 49    | 0.0154   | aat1 | Mm22108     | GO:000468 GO:0008150  |
| <a href="#">GO:0006918</a> | ribonucleoside metabolic process                                      | atp6v1d atp6a atp6b1c1 atp2aa6v1h                      | 3     | 70    | 0.0162   | aat1 | Mm22108     | GO:000468 GO:0008150  |
| <a href="#">GO:0006918</a> | actin cytoskeleton organization and biogenesis                        | epq4-10 naa cat                                        | 2     | 74    | 0.0162   | aat1 | Mm22446     | GO:0008152 GO:0008153 |
| <a href="#">GO:0006918</a> | purine nucleoside metabolic process                                   | atp6v1d atp6a atp6b1c1 atp2aa6v1h                      | 3     | 74    | 0.0162   | aat1 | Mm22108     | GO:000468 GO:0008150  |
| <a href="#">GO:0006918</a> | regulation of synaptic plasticity                                     | syngap1 kras                                           | 2     | 21    | 0.0255   | aat1 | Mm22108     | GO:000468 GO:0008150  |
| <a href="#">GO:0006918</a> | actin filament based process                                          | epq4-10 cat kras sirpa                                 | 4     | 165   | 0.0237   | aat1 | Mm22108     | GO:000468 GO:0008150  |
| <a href="#">GO:0006918</a> | visual behaviour                                                      | syngap1 kras                                           | 2     | 22    | 0.0237   | aat1 | Mm22108     | GO:000468 GO:0008150  |
| <a href="#">GO:0006918</a> | visual perception                                                     | syngap1 kras                                           | 2     | 22    | 0.0237   | aat1 | Mm22108     | GO:000468 GO:0008150  |
| <a href="#">GO:0006918</a> | regulation of synapse structure and activity                          | syngap1 kras                                           | 2     | 23    | 0.0254   | aat1 | Mm22108     | GO:000468 GO:0008150  |
| <a href="#">GO:0006918</a> | coenzyme biosynthetic process                                         | atp6v1d atp6a atp6b1c1 atp2aa6v1h                      | 3     | 83    | 0.0259   | aat1 | Mm22108     | GO:000468 GO:0008150  |
| <a href="#">GO:0031111</a> | negative regulation of microtubule polymerisation                     | smn1                                                   | 1     | 1     | 0.0266   | aat1 | Mm22108     | GO:000468 GO:0008150  |
| <a href="#">GO:0006918</a> | cellular component organisation and biogenesis                        | syngap1 tuba1a rab39 mapt smn1 epq4-10 arf1 rpl12 ep1a | 16    | 213   | 0.0358   | aat1 | Mm22108     | GO:000468 GO:0008150  |

**T0 Up 3h CC**

| Best GOs (Max 50)          | GO term                                                | Genes                                                 | Count | Total | P-Value  | Gene | Search Term | GOs                                         |
|----------------------------|--------------------------------------------------------|-------------------------------------------------------|-------|-------|----------|------|-------------|---------------------------------------------|
| <a href="#">GO:0005832</a> | cytoplasm                                              | act1 eef1g smn1 ssha mapt pcrab2 pafah1b2 tmem4 enc3a | 63    | 18253 | 5.40E-05 | aat1 | Mm22108     | GO:0005739 GO:0016020                       |
| <a href="#">GO:0042334</a> | prokin complex                                         | act1 eef1g smn1 ssha mapt pcrab2 pafah1b2 tmem4 enc3a | 15    | 1558  | 2.25E-03 | aat1 | Mm22942     | GO:0005739 GO:0016020                       |
| <a href="#">GO:0030291</a> | macromolecular complex                                 | act1 eef1g smn1 ssha mapt pcrab2 pafah1b2 tmem4 enc3a | 17    | 1963  | 0.00235  | aat1 | Mm22942     | GO:0005739 GO:0005885 GO:0019528 GO:0042995 |
| <a href="#">GO:0007474</a> | learning and memory                                    | act1 eef1g smn1 ssha mapt pcrab2 pafah1b2 tmem4 enc3a | 6     | 229   | 0.0037   | aat1 | Mm22108     | GO:000468 GO:0008150                        |
| <a href="#">GO:0006918</a> | mitochondrial inner membrane                           | act1 eef1g smn1 ssha mapt pcrab2 pafah1b2 tmem4 enc3a | 6     | 238   | 0.0037   | aat1 | Mm22108     | GO:000468 GO:0008150                        |
| <a href="#">GO:0006918</a> | mitochondrial membrane                                 | act1 eef1g smn1 ssha mapt pcrab2 pafah1b2 tmem4 enc3a | 6     | 248   | 0.0037   | aat1 | Mm22108     | GO:000468 GO:0008150                        |
| <a href="#">GO:0006918</a> | Asp23 protein complex                                  | act1 eef1g smn1 ssha mapt pcrab2 pafah1b2 tmem4 enc3a | 6     | 248   | 0.0037   | aat1 | Mm22108     | GO:000468 GO:0008150                        |
| <a href="#">GO:0006918</a> | cell projection                                        | act1 eef1g smn1 ssha mapt pcrab2 pafah1b2 tmem4 enc3a | 7     | 344   | 0.0037   | aat1 | Mm22108     | GO:000468 GO:0008150                        |
| <a href="#">GO:0006918</a> | learning and memory                                    | act1 eef1g smn1 ssha mapt pcrab2 pafah1b2 tmem4 enc3a | 6     | 229   | 0.0037   | aat1 | Mm22108     | GO:000468 GO:0008150                        |
| <a href="#">GO:0006918</a> | mitochondrial envelope                                 | act1 eef1g smn1 ssha mapt pcrab2 pafah1b2 tmem4 enc3a | 6     | 268   | 0.0038   | aat1 | Mm22108     | GO:000468 GO:0008150                        |
| <a href="#">GO:0006918</a> | cytoskeleton                                           | act1 eef1g smn1 ssha mapt pcrab2 pafah1b2 tmem4 enc3a | 10    | 859   | 0.0096   | aat1 | Mm22108     | GO:000468 GO:0008150                        |
| <a href="#">GO:0006918</a> | neuron projection                                      | syngap1 ga43 tpm3 mapt                                | 4     | 116   | 0.0096   | aat1 | Mm22108     | GO:000468 GO:0008150                        |
| <a href="#">GO:0006918</a> | mitochondrial part                                     | act1 eef1g smn1 ssha mapt pcrab2 pafah1b2 tmem4 enc3a | 6     | 316   | 0.0096   | aat1 | Mm22108     | GO:000468 GO:0008150                        |
| <a href="#">GO:0006918</a> | cytoplasmic part                                       | act1 eef1g smn1 ssha mapt pcrab2 pafah1b2 tmem4 enc3a | 21    | 3058  | 0.0096   | aat1 | Mm22108     | GO:000468 GO:0008150                        |
| <a href="#">GO:0006918</a> | membrane fraction                                      | act1 eef1g smn1 ssha mapt pcrab2 pafah1b2 tmem4 enc3a | 7     | 446   | 0.0099   | aat1 | Mm22108     | GO:000468 GO:0008150                        |
| <a href="#">GO:0006918</a> | mitochondrion                                          | act1 eef1g smn1 ssha mapt pcrab2 pafah1b2 tmem4 enc3a | 10    | 920   | 0.0099   | aat1 | Mm22108     | GO:000468 GO:0008150                        |
| <a href="#">GO:0006918</a> | cell fraction                                          | act1 eef1g smn1 ssha mapt pcrab2 pafah1b2 tmem4 enc3a | 7     | 498   | 0.0103   | aat1 | Mm22108     | GO:000468 GO:0008150                        |
| <a href="#">GO:0006918</a> | envelope                                               | act1 eef1g smn1 ssha mapt pcrab2 pafah1b2 tmem4 enc3a | 6     | 375   | 0.0115   | aat1 | Mm22108     | GO:000468 GO:0008150                        |
| <a href="#">GO:0006918</a> | organelle envelope                                     | act1 eef1g smn1 ssha mapt pcrab2 pafah1b2 tmem4 enc3a | 6     | 375   | 0.0115   | aat1 | Mm22108     | GO:000468 GO:0008150                        |
| <a href="#">GO:0006918</a> | cytoskeletal part                                      | act1 eef1g smn1 ssha mapt pcrab2 pafah1b2 tmem4 enc3a | 7     | 520   | 0.0118   | aat1 | Mm22108     | GO:000468 GO:0008150                        |
| <a href="#">GO:0006918</a> | organelle membrane                                     | act1 eef1g smn1 ssha mapt pcrab2 pafah1b2 tmem4 enc3a | 7     | 522   | 0.0118   | aat1 | Mm22108     | GO:000468 GO:0008150                        |
| <a href="#">GO:0006918</a> | intric to membrane                                     | act1 eef1g smn1 ssha mapt pcrab2 pafah1b2 tmem4 enc3a | 8     | 567   | 0.0138   | aat1 | Mm22108     | GO:000468 GO:0008150                        |
| <a href="#">GO:0006918</a> | integral to membrane                                   | act1 eef1g smn1 ssha mapt pcrab2 pafah1b2 tmem4 enc3a | 8     | 562   | 0.0154   | aat1 | Mm22108     | GO:000468 GO:0008150                        |
| <a href="#">GO:0006918</a> | vacuolar protein-transferring V-type ATPase, V1 domain | atp6v1h                                               | 1     | 1     | 0.0154   | aat1 | Mm22108     | GO:000468 GO:0008150                        |
| <a href="#">GO:0006918</a> | proton-transferring V-type ATPase, V1 domain           | atp6v1h                                               | 1     | 1     | 0.0154   | aat1 | Mm22108     | GO:000468 GO:0008150                        |
| <a href="#">GO:0006918</a> | cleavage furrow                                        | atp6v1h                                               | 1     | 2     | 0.0315   | aat1 | Mm22108     | GO:000468 GO:0008150                        |
| <a href="#">GO:0006918</a> | intracellular part                                     | act1 eef1g smn1 ssha mapt pcrab2 pafah1b2 tmem4 enc3a | 40    | 8417  | 0.0351   | aat1 | Mm22108     | GO:000468 GO:0008150                        |
| <a href="#">GO:0006918</a> | intracellular                                          | act1 eef1g smn1 ssha mapt pcrab2 pafah1b2 tmem4 enc3a | 41    | 8708  | 0.0351   | aat1 | Mm22108     | GO:000468 GO:0008150                        |
| <a href="#">GO:0006918</a> | glycogen 3-phosphate dehydrogenase complex             | act1 eef1g smn1 ssha mapt pcrab2 pafah1b2 tmem4 enc3a | 1     | 3     | 0.0403   | aat1 | Mm22108     | GO:000468 GO:0008150                        |
| <a href="#">GO:0006918</a> | podosome                                               | act1 eef1g smn1 ssha mapt pcrab2 pafah1b2 tmem4 enc3a | 1     | 3     | 0.0403   | aat1 | Mm22108     | GO:000468 GO:0008150                        |
| <a href="#">GO:0006918</a> | non-membrane-bound organelle                           | act1 eef1g smn1 ssha mapt pcrab2 pafah1b2 tmem4 enc3a | 1     | 1463  | 0.0412   | aat1 | Mm22108     | GO:000468 GO:0008150                        |
| <a href="#">GO:0006918</a> | non-membrane-bound organelle                           | act1 eef1g smn1 ssha mapt pcrab2 pafah1b2 tmem4 enc3a | 1     | 1463  | 0.0412   | aat1 | Mm22108     | GO:000468 GO:0008150                        |
| <a href="#">GO:0006918</a> | cell cortex                                            | act1 eef1g smn1 ssha mapt pcrab2 pafah1b2 tmem4 enc3a | 2     | 47    | 0.0412   | aat1 | Mm22108     | GO:000468 GO:0008150                        |
| <a href="#">GO:0006918</a> | intracellular organelle part                           | act1 eef1g smn1 ssha mapt pcrab2 pafah1b2 tmem4 enc3a | 15    | 2287  | 0.0412   | aat1 | Mm22108     | GO:000468 GO:0008150                        |
| <a href="#">GO:0006918</a> | organelle part                                         | act1 eef1g smn1 ssha mapt pcrab2 pafah1b2 tmem4 enc3  |       |       |          |      |             |                                             |



**Figure 2.4 - Source data file for Figure 2**

**Gostat analysis, for up-and down-regulated proteins (≥30% following tolerance (ToI), sampled at 24h**  
performed online at <http://gostat.welhi.edu.au/cg-bin/gostat.pl>

**Search parameters**

Against default GO database  
used database MGI (see [http://geneontology.org/gene-associations/readme/mgi\\_README](http://geneontology.org/gene-associations/readme/mgi_README))  
minimal length of GO path 3  
Subset Biological Process (BP), Cellular Component (CC), Molecular Function (MF)  
maximal p-value 0.1  
maximal number of GOs representation 50  
clustered over/under no  
multiple test FDR (Benjamini)

Datasets run 44/44  
ToI >30 (24h) 20/22  
ToI <30 (24h) 20/22

**ToI Up 24h BP**

| Best GOs (Max. 50) | GO term                                               | Genes                                                | Count | Total | P-Value  | Gene     | Search Term | GOs                                         |
|--------------------|-------------------------------------------------------|------------------------------------------------------|-------|-------|----------|----------|-------------|---------------------------------------------|
| GO:000684          | small GTPase mediated signal transduction             | rac1b3o balap2 arf1a dync111 rab3d rala rab2b        | 44    | 18253 | 3.27E-05 | actr1a   | Mm 3118     | GO:016192                                   |
| GO:0019043         | cellular component organization and biogenesis        | rac1b3o balap2 arf1a dync111 rab3d rala rab2b        | 9     | 337   | 0.00111  | actr1a   | Mm 3118     | GO:000888 GO:0007284 GO:0015031 GO:0016192  |
| GO:0011719         | localization                                          | rac1b3o balap2 arf1a dync111 rab3d rala rab2b        | 17    | 2619  | 0.00127  | actr1a   | Mm 3118     | GO:0007284 GO:000888 GO:0015031 GO:0016192  |
| GO:0007242         | intracellular signaling cascade                       | rac1b3o balap2 arf1a dync111 rab3d rala rab2b        | 11    | 865   | 0.00131  | atp1b1c1 | Mm 27618    | GO:0007185 GO:0007286 GO:0007399 GO:0048647 |
| GO:0016192         | vesicle-mediated transport                            | actr1a rac1b3o balap2 arf1a dync111 rab3d rala rab2b | 7     | 401   | 0.00234  | calb2    | Mm 2755     | GO:0006457 GO:0030886 GO:0040020            |
| GO:0008104         | transport                                             | rac1b3o balap2 arf1a dync111 rab3d rala rab2b        | 14    | 2259  | 0.0119   | dyx4c4   | Mm 250414   | GO:0006457                                  |
| GO:0016192         | establishment of cellular localization                | rac1b3o balap2 arf1a dync111 rab3d rala rab2b        | 8     | 710   | 0.0119   | dyx4c4   | Mm 250414   | GO:0006457                                  |
| GO:0016192         | cellular localization                                 | rac1b3o balap2 arf1a dync111 rab3d rala rab2b        | 8     | 722   | 0.0119   | dyx4c4   | Mm 250414   | GO:0006457                                  |
| GO:0016192         | establishment of localization                         | rac1b3o balap2 arf1a dync111 rab3d rala rab2b        | 14    | 2320  | 0.0124   | dyx4c4   | Mm 250414   | GO:0006457                                  |
| GO:0016192         | regulation of exocytosis                              | rac1b3o balap2 arf1a dync111 rab3d rala rab2b        | 2     | 16    | 0.028    | gpcr2a   | Mm 43662    | GO:0006096 GO:0030317 GO:0049821            |
| GO:0016192         | regulation of transport                               | rac1b3o balap2 arf1a dync111 rab3d rala rab2b        | 3     | 84    | 0.028    | gpcr2a   | Mm 43662    | GO:0006096 GO:0030317 GO:0049821            |
| GO:0016192         | stem cell self-renewal                                | rac1b3o balap2 arf1a dync111 rab3d rala rab2b        | 2     | 21    | 0.028    | gpcr2a   | Mm 43662    | GO:0006096 GO:0030317 GO:0049821            |
| GO:0016192         | regulation of glycolysis                              | rac1b3o balap2 arf1a dync111 rab3d rala rab2b        | 6     | 697   | 0.0307   | gpcr2a   | Mm 43662    | GO:0006096 GO:0030317 GO:0049821            |
| GO:0046130         | male gamete generation                                | rac1b3o balap2 arf1a dync111 rab3d rala rab2b        | 4     | 195   | 0.0310   | gpcr2a   | Mm 43662    | GO:0006096 GO:0030317 GO:0049821            |
| GO:0046130         | synaptic vesicle transport                            | rac1b3o balap2 arf1a dync111 rab3d rala rab2b        | 2     | 23    | 0.0308   | gpcr2a   | Mm 43662    | GO:0006096 GO:0030317 GO:0049821            |
| GO:0046130         | intracellular transport                               | rac1b3o balap2 arf1a dync111 rab3d rala rab2b        | 1     | 1     | 0.0307   | gpcr2a   | Mm 43662    | GO:0006096 GO:0030317 GO:0049821            |
| GO:0046130         | positive regulation of protein export from nucleus    | rac1b3o balap2 arf1a dync111 rab3d rala rab2b        | 1     | 1     | 0.0307   | gpcr2a   | Mm 43662    | GO:0006096 GO:0030317 GO:0049821            |
| GO:0046130         | regulation of glycolysis                              | rac1b3o balap2 arf1a dync111 rab3d rala rab2b        | 1     | 1     | 0.0307   | gpcr2a   | Mm 43662    | GO:0006096 GO:0030317 GO:0049821            |
| GO:0006792         | glucan metabolic process                              | rac1b3o balap2 arf1a dync111 rab3d rala rab2b        | 2     | 31    | 0.0307   | gpcr2a   | Mm 43662    | GO:0006096 GO:0030317 GO:0049821            |
| GO:0006792         | glycogen metabolic process                            | rac1b3o balap2 arf1a dync111 rab3d rala rab2b        | 2     | 31    | 0.0307   | gpcr2a   | Mm 43662    | GO:0006096 GO:0030317 GO:0049821            |
| GO:0006792         | glycogen storage                                      | rac1b3o balap2 arf1a dync111 rab3d rala rab2b        | 4     | 250   | 0.0455   | gpcr2a   | Mm 43662    | GO:0006096 GO:0030317 GO:0049821            |
| GO:0006792         | energy reserve metabolic process                      | rac1b3o balap2 arf1a dync111 rab3d rala rab2b        | 2     | 35    | 0.0455   | gpcr2a   | Mm 43662    | GO:0006096 GO:0030317 GO:0049821            |
| GO:0006792         | protein transport                                     | rac1b3o balap2 arf1a dync111 rab3d rala rab2b        | 6     | 624   | 0.0476   | gpcr2a   | Mm 43662    | GO:0006096 GO:0030317 GO:0049821            |
| GO:0006792         | protein folding                                       | rac1b3o balap2 arf1a dync111 rab3d rala rab2b        | 6     | 130   | 0.0478   | gpcr2a   | Mm 43662    | GO:0006096 GO:0030317 GO:0049821            |
| GO:0006792         | organelle organization and biogenesis                 | rac1b3o balap2 arf1a dync111 rab3d rala rab2b        | 6     | 656   | 0.0482   | gpcr2a   | Mm 43662    | GO:0006096 GO:0030317 GO:0049821            |
| GO:0006792         | establishment of protein localization                 | rac1b3o balap2 arf1a dync111 rab3d rala rab2b        | 2     | 47    | 0.0545   | gpcr2a   | Mm 43662    | GO:0006096 GO:0030317 GO:0049821            |
| GO:0006792         | regulation of protein export from nucleus             | rac1b3o balap2 arf1a dync111 rab3d rala rab2b        | 4     | 292   | 0.0578   | gpcr2a   | Mm 43662    | GO:0006096 GO:0030317 GO:0049821            |
| GO:0006792         | sexual reproduction                                   | rac1b3o balap2 arf1a dync111 rab3d rala rab2b        | 2     | 47    | 0.0581   | gpcr2a   | Mm 43662    | GO:0006096 GO:0030317 GO:0049821            |
| GO:0006792         | cellular polysaccharide metabolic process             | rac1b3o balap2 arf1a dync111 rab3d rala rab2b        | 2     | 47    | 0.0581   | gpcr2a   | Mm 43662    | GO:0006096 GO:0030317 GO:0049821            |
| GO:0006792         | polysaccharide metabolic process                      | rac1b3o balap2 arf1a dync111 rab3d rala rab2b        | 2     | 47    | 0.0581   | gpcr2a   | Mm 43662    | GO:0006096 GO:0030317 GO:0049821            |
| GO:0006792         | cell cycle                                            | rac1b3o balap2 arf1a dync111 rab3d rala rab2b        | 6     | 708   | 0.0584   | gpcr2a   | Mm 43662    | GO:0006096 GO:0030317 GO:0049821            |
| GO:0006792         | protein localization                                  | rac1b3o balap2 arf1a dync111 rab3d rala rab2b        | 3     | 3     | 0.064    | gpcr2a   | Mm 43662    | GO:0006096 GO:0030317 GO:0049821            |
| GO:0006792         | acetylation                                           | rac1b3o balap2 arf1a dync111 rab3d rala rab2b        | 1     | 3     | 0.064    | gpcr2a   | Mm 43662    | GO:0006096 GO:0030317 GO:0049821            |
| GO:0006792         | retrograde axon cargo transport                       | rac1b3o balap2 arf1a dync111 rab3d rala rab2b        | 4     | 324   | 0.064    | gpcr2a   | Mm 43662    | GO:0006096 GO:0030317 GO:0049821            |
| GO:0006792         | cellular homeostasis                                  | rac1b3o balap2 arf1a dync111 rab3d rala rab2b        | 4     | 324   | 0.064    | gpcr2a   | Mm 43662    | GO:0006096 GO:0030317 GO:0049821            |
| GO:0006792         | cell motility                                         | rac1b3o balap2 arf1a dync111 rab3d rala rab2b        | 6     | 731   | 0.0643   | gpcr2a   | Mm 43662    | GO:0006096 GO:0030317 GO:0049821            |
| GO:0006792         | macromolecule localization                            | rac1b3o balap2 arf1a dync111 rab3d rala rab2b        | 3     | 178   | 0.0661   | gpcr2a   | Mm 43662    | GO:0006096 GO:0030317 GO:0049821            |
| GO:0006792         | regulation of progression through cell cycle          | rac1b3o balap2 arf1a dync111 rab3d rala rab2b        | 3     | 178   | 0.0661   | gpcr2a   | Mm 43662    | GO:0006096 GO:0030317 GO:0049821            |
| GO:0006792         | regulation of cell cycle                              | rac1b3o balap2 arf1a dync111 rab3d rala rab2b        | 1     | 4     | 0.0661   | gpcr2a   | Mm 43662    | GO:0006096 GO:0030317 GO:0049821            |
| GO:0006792         | glycogen catabolic process                            | rac1b3o balap2 arf1a dync111 rab3d rala rab2b        | 1     | 4     | 0.0661   | gpcr2a   | Mm 43662    | GO:0006096 GO:0030317 GO:0049821            |
| GO:0006792         | carbohydrate process                                  | rac1b3o balap2 arf1a dync111 rab3d rala rab2b        | 1     | 4     | 0.0661   | gpcr2a   | Mm 43662    | GO:0006096 GO:0030317 GO:0049821            |
| GO:0006792         | positive regulation of carbohydrate metabolic process | rac1b3o balap2 arf1a dync111 rab3d rala rab2b        | 1     | 4     | 0.0661   | gpcr2a   | Mm 43662    | GO:0006096 GO:0030317 GO:0049821            |
| GO:0006792         | regulation of cell cycle                              | rac1b3o balap2 arf1a dync111 rab3d rala rab2b        | 1     | 4     | 0.0661   | gpcr2a   | Mm 43662    | GO:0006096 GO:0030317 GO:0049821            |
| GO:0006792         | regulation of meiosis                                 | rac1b3o balap2 arf1a dync111 rab3d rala rab2b        | 3     | 183   | 0.0714   | gpcr2a   | Mm 43662    | GO:0006096 GO:0030317 GO:0049821            |
| GO:0006792         | ribonucleoprotein complex biogenesis and assembly     | rac1b3o balap2 arf1a dync111 rab3d rala rab2b        | 2     | 86    | 0.0719   | gpcr2a   | Mm 43662    | GO:0006096 GO:0030317 GO:0049821            |
| GO:0006792         | energy derivation by oxidation of organic compounds   | rac1b3o balap2 arf1a dync111 rab3d rala rab2b        | 2     | 86    | 0.0719   | gpcr2a   | Mm 43662    | GO:0006096 GO:0030317 GO:0049821            |

**ToI Up 24h CC**

| Best GOs (Max. 50) | GO term                                    | Genes                                         | Count | Total | P-Value  | Gene   | Search Term | GOs                                                                          |
|--------------------|--------------------------------------------|-----------------------------------------------|-------|-------|----------|--------|-------------|------------------------------------------------------------------------------|
| GO:0005829         | cytoplasm                                  | rac1b3o balap2 arf1a dync111 rab3d rala rab2b | 44    | 8214  | 3.40E-05 | actr1a | Mm 3118     | GO:0005737 GO:0005854 GO:0005889 GO:0005896 GO:0005918 GO:0005984 GO:0015629 |
| GO:0005829         | intracellular                              | rac1b3o balap2 arf1a dync111 rab3d rala rab2b | 35    | 8708  | 2.24E-03 | actr1a | Mm 3118     | GO:0005737 GO:0005854 GO:0005889 GO:0005896 GO:0005918 GO:0005984 GO:0015629 |
| GO:0044248         | Zygomycota                                 | rac1b3o balap2 arf1a dync111 rab3d rala rab2b | 2     | 5     | 0.00234  | actr1a | Mm 3118     | GO:0005737 GO:0005854 GO:0005889 GO:0005896 GO:0005918 GO:0005984 GO:0015629 |
| GO:0005829         | cytoskeletal part                          | rac1b3o balap2 arf1a dync111 rab3d rala rab2b | 3     | 468   | 0.00235  | actr1a | Mm 3118     | GO:0005737 GO:0005854 GO:0005889 GO:0005896 GO:0005918 GO:0005984 GO:0015629 |
| GO:0044244         | intracellular part                         | rac1b3o balap2 arf1a dync111 rab3d rala rab2b | 32    | 8417  | 0.0138   | actr1a | Mm 3118     | GO:0005737 GO:0005854 GO:0005889 GO:0005896 GO:0005918 GO:0005984 GO:0015629 |
| GO:0006829         | cytosol                                    | rac1b3o balap2 arf1a dync111 rab3d rala rab2b | 5     | 337   | 0.0208   | actr1a | Mm 3118     | GO:0005737 GO:0005854 GO:0005889 GO:0005896 GO:0005918 GO:0005984 GO:0015629 |
| GO:0006829         | cytoskeletal part                          | rac1b3o balap2 arf1a dync111 rab3d rala rab2b | 3     | 94    | 0.0208   | actr1a | Mm 3118     | GO:0005737 GO:0005854 GO:0005889 GO:0005896 GO:0005918 GO:0005984 GO:0015629 |
| GO:0006829         | macromolecular complex                     | rac1b3o balap2 arf1a dync111 rab3d rala rab2b | 12    | 1863  | 0.0209   | actr1a | Mm 3118     | GO:0005737 GO:0005854 GO:0005889 GO:0005896 GO:0005918 GO:0005984 GO:0015629 |
| GO:0006829         | microtubule associated complex             | rac1b3o balap2 arf1a dync111 rab3d rala rab2b | 3     | 102   | 0.0209   | actr1a | Mm 3118     | GO:0005737 GO:0005854 GO:0005889 GO:0005896 GO:0005918 GO:0005984 GO:0015629 |
| GO:0044244         | intracellular non-membrane-bound organelle | rac1b3o balap2 arf1a dync111 rab3d rala rab2b | 10    | 1463  | 0.0209   | actr1a | Mm 3118     | GO:0005737 GO:0005854 GO:0005889 GO:0005896 GO:0005918 GO:0005984 GO:0015629 |
| GO:0044248         | non-membrane-bound organelle               | rac1b3o balap2 arf1a dync111 rab3d rala rab2b | 10    | 1463  | 0.0209   | actr1a | Mm 3118     | GO:0005737 GO:0005854 GO:0005889 GO:0005896 GO:0005918 GO:0005984 GO:0015629 |
| GO:0006829         | secretory granule                          | rac1b3o balap2 arf1a dync111 rab3d rala rab2b | 2     | 38    | 0.0246   | actr1a | Mm 3118     | GO:0005737 GO:0005854 GO:0005889 GO:0005896 GO:0005918 GO:0005984 GO:0015629 |
| GO:0006829         | ribosome                                   | rac1b3o balap2 arf1a dync111 rab3d rala rab2b | 17    | 526   | 0.0256   | actr1a | Mm 3118     | GO:0005737 GO:0005854 GO:0005889 GO:0005896 GO:0005918 GO:0005984 GO:0015629 |
| GO:0006829         | intracellular membrane                     | rac1b3o balap2 arf1a dync111 rab3d rala rab2b | 5     | 567   | 0.0277   | actr1a | Mm 3118     | GO:0005737 GO:0005854 GO:0005889 GO:0005896 GO:0005918 GO:0005984 GO:0015629 |
| GO:0006829         | integral to membrane                       | rac1b3o balap2 arf1a dync111 rab3d rala rab2b | 4     | 567   | 0.0277   | actr1a | Mm 3118     | GO:0005737 GO:0005854 GO:0005889 GO:0005896 GO:0005918 GO:0005984 GO:0015629 |
| GO:0006829         | cell                                       | rac1b3o balap2 arf1a dync111 rab3d rala rab2b | 41    | 13677 | 0.0277   | actr1a | Mm 3118     | GO:0005737 GO:0005854 GO:0005889 GO:0005896 GO:0005918 GO:0005984 GO:0015629 |
| GO:0044244         | cell part                                  | rac1b3o balap2 arf1a dync111 rab3d rala rab2b | 41    | 13677 | 0.0277   | actr1a | Mm 3118     | GO:0005737 GO:0005854 GO:0005889 GO:0005896 GO:0005918 GO:0005984 GO:0015629 |
| GO:0044248         | Zygomycota membrane                        | rac1b3o balap2 arf1a dync111 rab3d rala rab2b | 1     | 4     | 0.0602   | actr1a | Mm 3118     | GO:0005737 GO:0005854 GO:0005889 GO:0005896 GO:0005918 GO:0005984 GO:0015629 |
| GO:0006829         | DNA replication factor complex             | rac1b3o balap2 arf1a dync111 rab3d rala rab2b | 1     | 5     | 0.0714   | actr1a | Mm 3118     | GO:0005737 GO:0005854 GO:0005889 GO:0005896 GO:0005918 GO:0005984 GO:0015629 |
| GO:0006829         | dynactin complex                           | rac1b3o balap2 arf1a dync111 rab3d rala rab2b | 1     | 7     | 0.0846   | actr1a | Mm 3118     | GO:0005737 GO:0005854 GO:0005889 GO:0005896 GO:0005918 GO:0005984 GO:0015629 |

**ToI Up 24h MF**

| Best GOs (Max. 50) | GO term                       | Genes                                         | Count | Total | P-Value  | Gene   | Search Term | GOs                                                                          |
|--------------------|-------------------------------|-----------------------------------------------|-------|-------|----------|--------|-------------|------------------------------------------------------------------------------|
| GO:0005245         | GTP binding                   | rac1b3o balap2 arf1a dync111 rab3d rala rab2b | 44    | 8214  | 9.12E-05 | actr1a | Mm 3118     | GO:0005737 GO:0005854 GO:0005889 GO:0005896 GO:0005918 GO:0005984 GO:0015629 |
| GO:0032541         | ribonucleotide binding        | rac1b3o balap2 arf1a dync111 rab3d rala rab2b | 11    | 325   | 0.00235  | actr1a | Mm 3118     | GO:0005737 GO:0005854 GO:0005889 GO:0005896 GO:0005918 GO:0005984 GO:0015629 |
| GO:0032541         | guanylate nucleotide binding  | rac1b3o balap2 arf1a dync111 rab3d rala rab2b | 11    | 325   | 0.00235  | actr1a | Mm 3118     | GO:0005737 GO:0005854 GO:0005889 GO:0005896 GO:0005918 GO:0005984 GO:0015629 |
| GO:0032543         | ribonucleotide binding        | rac1b3o balap2 arf1a dync111 rab3d rala rab2b | 16    | 1554  | 0.00235  | actr1a | Mm 3118     | GO:0005737 GO:0005854 GO:0005889 GO:0005896 GO:0005918 GO:0005984 GO:0015629 |
| GO:0032545         | purine ribonucleotide binding | rac1b3o balap2 arf1a dync111 rab3d rala rab2b | 16    | 1554  | 0.00235  | actr1a | Mm 3118     | GO:0005737 GO:0005854 GO:0005889 GO:0005896 GO:0005918 GO:0005984 GO:0015629 |
| GO:0004616         | nucleotide binding            | rac1b3o balap2 arf1a                          |       |       |          |        |             |                                                                              |

|            |                                                |                |   |    |        |        |         |            |            |
|------------|------------------------------------------------|----------------|---|----|--------|--------|---------|------------|------------|
| GO:0043748 | protein polymerization                         | tuba to tuba1a | 2 | 39 | 0.0159 | pki    | Mm29949 | GO:0006096 |            |
| GO:0006222 | water-soluble vitamin metabolic process        | pkc            | 2 | 39 | 0.0159 | pkc2   | Mm21754 | GO:0006096 |            |
| GO:0044961 | skeletal myofibril assembly                    | act1           | 1 | 1  | 0.0168 | pkp1a  | Mm4264  | GO:0006112 |            |
| GO:003340  | muscle thin filament assembly                  | act1           | 1 | 1  | 0.0168 | pkc    | Mm5265  | GO:0006110 | GO:0006336 |
| GO:0006096 | glycolysis                                     | pki            | 2 | 46 | 0.0175 | snb    | Mm20043 | GO:0042417 |            |
| GO:0044961 | cellular macromolecule catabolic process       | pki            | 1 | 1  | 0.0168 | pkc2   | Mm5102  | GO:0006110 |            |
| GO:0042410 | vitamin B9 biosynthetic process                | pkc            | 1 | 2  | 0.0243 | tblot1 | Mm29182 | GO:0009775 | GO:0006098 |
| GO:0042410 | vitamin B1 metabolic process                   | pkc            | 1 | 2  | 0.0243 | tuba1a | Mm43660 | GO:0007117 | GO:0005258 |
| GO:0006096 | pyridoxine biosynthetic process                | pkc            | 1 | 2  | 0.0243 | tuba1b | Mm39213 | GO:0007018 | GO:0005258 |
| GO:0006096 | vitamin metabolic process                      | pkc            | 1 | 2  | 0.0243 | tblot1 | Mm29182 | GO:0009775 | GO:0006098 |
| GO:0006096 | transport                                      | pkc            | 1 | 2  | 0.0243 | tblot1 | Mm29182 | GO:0009775 | GO:0006098 |
| GO:0006096 | establishment of localization                  | pkc            | 1 | 2  | 0.0243 | tblot1 | Mm29182 | GO:0009775 | GO:0006098 |
| GO:0006096 | microtubule-based movement                     | pkc            | 1 | 2  | 0.0243 | tblot1 | Mm29182 | GO:0009775 | GO:0006098 |
| GO:0006096 | cardiac myofibril assembly                     | pkc            | 1 | 2  | 0.0243 | tblot1 | Mm29182 | GO:0009775 | GO:0006098 |
| GO:0006096 | macromolecule catabolic process                | pkc            | 1 | 2  | 0.0243 | tblot1 | Mm29182 | GO:0009775 | GO:0006098 |
| GO:0006096 | ribosomal protein import into nucleus          | pkc            | 1 | 2  | 0.0243 | tblot1 | Mm29182 | GO:0009775 | GO:0006098 |
| GO:0006096 | cytoskeleton-dependent intracellular transport | pkc            | 1 | 2  | 0.0243 | tblot1 | Mm29182 | GO:0009775 | GO:0006098 |
| GO:0044961 | cellular metabolic process                     | pkc            | 1 | 2  | 0.0243 | tblot1 | Mm29182 | GO:0009775 | GO:0006098 |
| GO:0006096 | cardiac muscle morphogenesis                   | pkc            | 1 | 2  | 0.0243 | tblot1 | Mm29182 | GO:0009775 | GO:0006098 |
| GO:0006096 | cardiac muscle cell development                | pkc            | 1 | 2  | 0.0243 | tblot1 | Mm29182 | GO:0009775 | GO:0006098 |
| GO:0044961 | localization                                   | pkc            | 1 | 2  | 0.0243 | tblot1 | Mm29182 | GO:0009775 | GO:0006098 |
| GO:0006096 | muscle morphogenesis                           | pkc            | 1 | 2  | 0.0243 | tblot1 | Mm29182 | GO:0009775 | GO:0006098 |
| GO:0006096 | pentose-phosphate shunt                        | pkc            | 1 | 2  | 0.0243 | tblot1 | Mm29182 | GO:0009775 | GO:0006098 |
| GO:0006096 | NADPH regeneration                             | pkc            | 1 | 2  | 0.0243 | tblot1 | Mm29182 | GO:0009775 | GO:0006098 |
| GO:0044961 | cellular catabolic process                     | pkc            | 1 | 2  | 0.0243 | tblot1 | Mm29182 | GO:0009775 | GO:0006098 |
| GO:0006096 | coenzyme metabolic process                     | pkc            | 1 | 2  | 0.0243 | tblot1 | Mm29182 | GO:0009775 | GO:0006098 |
| GO:0006096 | cytoskeleton organization and biogenesis       | pkc            | 1 | 2  | 0.0243 | tblot1 | Mm29182 | GO:0009775 | GO:0006098 |
| GO:0006096 | myofibril assembly                             | pkc            | 1 | 2  | 0.0243 | tblot1 | Mm29182 | GO:0009775 | GO:0006098 |
| GO:0006096 | NADP metabolic process                         | pkc            | 1 | 2  | 0.0243 | tblot1 | Mm29182 | GO:0009775 | GO:0006098 |
| GO:0006096 | stabilized muscle cell development             | pkc            | 1 | 2  | 0.0243 | tblot1 | Mm29182 | GO:0009775 | GO:0006098 |
| GO:0006096 | protein import into nucleus, docking           | pkc            | 1 | 2  | 0.0243 | tblot1 | Mm29182 | GO:0009775 | GO:0006098 |
| GO:0006096 | muscle cell development                        | pkc            | 1 | 2  | 0.0243 | tblot1 | Mm29182 | GO:0009775 | GO:0006098 |
| GO:0006096 | microtubule-based process                      | pkc            | 1 | 2  | 0.0243 | tblot1 | Mm29182 | GO:0009775 | GO:0006098 |
| GO:0006096 | nucleotide metabolic process                   | pkc            | 1 | 2  | 0.0243 | tblot1 | Mm29182 | GO:0009775 | GO:0006098 |
| GO:0006096 | telomere organization and biogenesis           | pkc            | 1 | 2  | 0.0243 | tblot1 | Mm29182 | GO:0009775 | GO:0006098 |
| GO:0044961 | water-soluble vitamin biosynthetic process     | pkc            | 1 | 2  | 0.0243 | tblot1 | Mm29182 | GO:0009775 | GO:0006098 |
| GO:0006096 | telomere maintenance                           | pkc            | 1 | 2  | 0.0243 | tblot1 | Mm29182 | GO:0009775 | GO:0006098 |

**Tot Down 24h CC**

Best GOs (Max. 50)

GO:0044446

GO:0044422

GO:0007017

GO:0000241

GO:003340

GO:0006096

GO:0044961

GO:0042410

GO:0006096

GO:0044961

GO:0006096

GO
